# Supplementary material
Source: publisher site journal article supplement (https://www.dovepress.com/article/436735)
Supplement: Supplementary file 1 [file get_supplementary_file.php]

Table S1. Labels of each item within C-ZTPI-20

| Item <sup>a</sup> | Item Label in C-ZTPI-20 (Wang et al., 2015)/ZTPI-20 (Orkibi, 2015) | Item Label in original ZTPI (Zimbardo & Boyd, 1999) | Dimension          | Item # in network analysis | Dimension color in network analysis |
|-------------------|--------------------------------------------------------------------|-----------------------------------------------------|--------------------|----------------------------|-------------------------------------|
| 1. S1             | Item 1                                                             | Item 1                                              | Present Hedonistic | 9                          | Green                               |
| 2. S2             | Item 2                                                             | Item 2                                              | Past Positive      | 1                          | Pink                                |
| 3. S3             | Item 3                                                             | Item 10                                             | Future             | 17                         | Purple                              |
| 4. S4             | Item 4                                                             | Item 13                                             | Future             | 18                         | Purple                              |
| 5. S5             | Item 5                                                             | Item 14                                             | Present Fatalistic | 13                         | Blue                                |
| 6. S6             | Item 6                                                             | Item 16                                             | Past Negative      | 5                          | Yellow                              |
| 7. S7             | Item 7                                                             | Item 20                                             | Past Positive      | 2                          | Pink                                |
| 8. S8             | Item 8                                                             | Item 22                                             | Past Negative      | 6                          | Yellow                              |
| 9. S9             | Item 9                                                             | Item 29                                             | Past Positive      | 3                          | Pink                                |
| 10. S10           | Item 10                                                            | Item 31                                             | Present Hedonistic | 10                         | Green                               |
| 11. S11           | Item 11                                                            | Item 34                                             | Past Negative      | 7                          | Yellow                              |
| 12. S12           | Item 12                                                            | Item 37                                             | Present Fatalistic | 14                         | Blue                                |
| 13. S13           | Item 13                                                            | Item 38                                             | Present Fatalistic | 15                         | Blue                                |
| 14. S14           | Item 14                                                            | Item 39                                             | Present Fatalistic | 16                         | Blue                                |
| 15. S15           | Item 15                                                            | Item 42                                             | Present Hedonistic | 11                         | Green                               |
| 16. S16           | Item 16                                                            | Item 10                                             | Future             | 19                         | Purple                              |
| 17. S17           | Item 17                                                            | Item 49                                             | Past Positive      | 4                          | Pink                                |
| 18. S18           | Item 18                                                            | Item 50                                             | Past Negative      | 8                          | Yellow                              |
| 19. S19           | Item 19                                                            | Item 51                                             | Future             | 20                         | Purple                              |
| 20. S20           | Item 20                                                            | Item 55                                             | Present Hedonistic | 12                         | Green                               |

Note: a Readers interested in accessing the original ZTPI-20 statements can refer to the provided anonymous link:

[[https://osf.io/zhucx/?view\\_only=88c729623f4a403885e26fff4baffe9b](https://osf.io/zhucx/?view_only=88c729623f4a403885e26fff4baffe9b)]

Table S2. Item-level reliability test.

| Dimension/Item     | Item-test correlation | Item-rest correlation | Average interitem covariance | Cranach's alpha if item deleted |
|--------------------|-----------------------|-----------------------|------------------------------|---------------------------------|
| Past Positive      |                       |                       |                              |                                 |
| Item 2             | 0.779                 | 0.597                 | 0.368                        | 0.554                           |
| Item 7             | 0.704                 | 0.464                 | 0.441                        | 0.631                           |
| Item 9             | 0.747                 | 0.498                 | 0.388                        | 0.609                           |
| Item 17            | 0.665                 | 0.361                 | 0.489                        | 0.702                           |
| Test scale         |                       |                       | 0.422                        | 0.690                           |
| Past Negative      |                       |                       |                              |                                 |
| Item 6             | 0.820                 | 0.649                 | 0.591                        | 0.665                           |
| Item 8             | 0.628                 | 0.374                 | 0.888                        | 0.805                           |
| Item 11            | 0.784                 | 0.585                 | 0.644                        | 0.701                           |
| Item 18            | 0.831                 | 0.675                 | 0.580                        | 0.652                           |
| Test scale         |                       |                       | 0.676                        | 0.767                           |
| Present Fatalistic |                       |                       |                              |                                 |
| Item 1             | 0.591                 | 0.278                 | 0.340                        | 0.538                           |
| Item 10            | 0.680                 | 0.356                 | 0.264                        | 0.477                           |
| Item 15            | 0.717                 | 0.426                 | 0.221                        | 0.416                           |
| Item 20            | 0.633                 | 0.316                 | 0.304                        | 0.509                           |
| Test scale         |                       |                       | 0.282                        | 0.559                           |
| Present Hedonistic |                       |                       |                              |                                 |
| Item 5             | 0.700                 | 0.450                 | 0.450                        | 0.652                           |
| Item 12            | 0.727                 | 0.480                 | 0.419                        | 0.633                           |
| Item 13            | 0.746                 | 0.510                 | 0.398                        | 0.614                           |
| Item 14            | 0.721                 | 0.482                 | 0.427                        | 0.632                           |
| Test scale         |                       |                       | 0.423                        | 0.697                           |
| Future             |                       |                       |                              |                                 |
| Item 3             | 0.751                 | 0.537                 | 0.383                        | 0.647                           |
| Item 4             | 0.760                 | 0.528                 | 0.368                        | 0.652                           |
| Item 16            | 0.714                 | 0.470                 | 0.417                        | 0.686                           |
| Item 19            | 0.733                 | 0.513                 | 0.400                        | 0.661                           |
| Test scale         |                       |                       | 0.392                        | 0.723                           |

Table S3. Model estimates of CFA in the total sample (n = 2634).

|                                     | Estimate | S.E.  | z      | p      |     | LLCI   | ULCI  |
|-------------------------------------|----------|-------|--------|--------|-----|--------|-------|
| Latent Variables:                   |          |       |        |        |     |        |       |
| Past Positive =~ Item 2             | 0.752    | 0.035 | 21.332 | < .001 | *** | 0.683  | 0.821 |
| Past Positive =~ Item 7             | 0.585    | 0.039 | 15.057 | < .001 | *** | 0.509  | 0.661 |
| Past Positive =~ Item 9             | 0.585    | 0.042 | 13.773 | < .001 | *** | 0.502  | 0.669 |
| Past Positive =~ Item 17            | 0.785    | 0.037 | 21.008 | < .001 | *** | 0.712  | 0.859 |
| Past Negative =~ Item 6             | 0.984    | 0.030 | 32.322 | < .001 | *** | 0.924  | 1.043 |
| Past Negative =~ Item 8             | 0.585    | 0.037 | 15.685 | < .001 | *** | 0.512  | 0.658 |
| Past Negative =~ Item 11            | 0.948    | 0.032 | 29.827 | < .001 | *** | 0.886  | 1.011 |
| Past Negative =~ Item 18            | 0.966    | 0.029 | 33.556 | < .001 | *** | 0.910  | 1.023 |
| Present Hedonistic =~ Item 1        | 0.623    | 0.037 | 16.792 | < .001 | *** | 0.551  | 0.696 |
| Present Hedonistic =~ Item 10       | 0.505    | 0.043 | 11.883 | < .001 | *** | 0.422  | 0.589 |
| Present Hedonistic =~ Item 15       | 0.466    | 0.038 | 12.419 | < .001 | *** | 0.393  | 0.540 |
| Present Hedonistic =~ Item 20       | 0.462    | 0.038 | 12.162 | < .001 | *** | 0.388  | 0.537 |
| Present Fatalistic =~ Item 5        | 0.565    | 0.034 | 16.387 | < .001 | *** | 0.498  | 0.633 |
| Present Fatalistic =~ Item 12       | 0.659    | 0.035 | 18.889 | < .001 | *** | 0.591  | 0.728 |
| Present Fatalistic =~ Item 13       | 0.778    | 0.035 | 22.025 | < .001 | *** | 0.709  | 0.848 |
| Present Fatalistic =~ Item 14       | 0.449    | 0.036 | 12.481 | < .001 | *** | 0.378  | 0.520 |
| Future =~ Item 3                    | 0.687    | 0.032 | 21.772 | < .001 | *** | 0.625  | 0.749 |
| Future =~ Item 4                    | 0.534    | 0.035 | 15.316 | < .001 | *** | 0.466  | 0.602 |
| Future =~ Item 16                   | 0.488    | 0.037 | 13.363 | < .001 | *** | 0.417  | 0.560 |
| Future =~ Item 19                   | 0.644    | 0.032 | 20.439 | < .001 | *** | 0.583  | 0.706 |
| Covariances:                        |          |       |        |        |     |        |       |
| Past Positive =~ Past Negative      | -0.076   | 0.041 | -1.839 | 0.066  |     | -0.157 | 0.005 |
| Past Positive =~ Present Hedonistic | 0.568    | 0.039 | 14.590 | < .001 | *** | 0.492  | 0.645 |

|                                                            | Estimate | S.E.  | z       | p      |     | LLCI   | ULCI   |
|------------------------------------------------------------|----------|-------|---------|--------|-----|--------|--------|
| Past Positive $\rightleftharpoons$ Present Fatalistic      | -0.212   | 0.046 | -4.640  | < .001 | *** | -0.301 | -0.122 |
| Past Positive $\rightleftharpoons$ Future                  | 0.533    | 0.036 | 14.850  | < .001 | *** | 0.463  | 0.604  |
| Past Negative $\rightleftharpoons$ Present Hedonistic      | 0.145    | 0.046 | 3.170   | 0.002  | **  | 0.055  | 0.234  |
| Past Negative $\rightleftharpoons$ Present Fatalistic      | 0.682    | 0.028 | 24.130  | < .001 | *** | 0.626  | 0.737  |
| Past Negative $\rightleftharpoons$ Future                  | -0.357   | 0.037 | -9.645  | < .001 | *** | -0.429 | -0.284 |
| Present Hedonistic $\rightleftharpoons$ Present Fatalistic | 0.180    | 0.050 | 3.586   | < .001 | *** | 0.081  | 0.278  |
| Present Hedonistic $\rightleftharpoons$ Future             | 0.277    | 0.050 | 5.565   | < .001 | *** | 0.179  | 0.374  |
| Present Fatalistic $\rightleftharpoons$ Future             | -0.557   | 0.041 | -13.601 | < .001 | *** | -0.637 | -0.476 |
| Variances:                                                 |          |       |         |        |     |        |        |
| Item 2                                                     | 0.454    | 0.042 | 10.935  | < .001 | *** | 0.373  | 0.536  |
| Item 7                                                     | 0.690    | 0.047 | 14.705  | < .001 | *** | 0.598  | 0.782  |
| Item 9                                                     | 1.007    | 0.047 | 21.415  | < .001 | *** | 0.915  | 1.099  |
| Item 17                                                    | 0.762    | 0.050 | 15.335  | < .001 | *** | 0.665  | 0.860  |
| Item 6                                                     | 0.538    | 0.044 | 12.188  | < .001 | *** | 0.452  | 0.625  |
| Item 8                                                     | 0.961    | 0.050 | 19.261  | < .001 | *** | 0.863  | 1.059  |
| Item 11                                                    | 0.676    | 0.049 | 13.796  | < .001 | *** | 0.580  | 0.772  |
| Item 18                                                    | 0.558    | 0.037 | 15.056  | < .001 | *** | 0.485  | 0.630  |
| Item 1                                                     | 0.618    | 0.042 | 14.622  | < .001 | *** | 0.535  | 0.701  |
| Item 10                                                    | 0.982    | 0.049 | 20.035  | < .001 | *** | 0.886  | 1.078  |
| Item 15                                                    | 0.835    | 0.040 | 20.864  | < .001 | *** | 0.757  | 0.913  |
| Item 20                                                    | 0.916    | 0.044 | 20.597  | < .001 | *** | 0.829  | 1.003  |
| Item 5                                                     | 0.723    | 0.039 | 18.570  | < .001 | *** | 0.647  | 0.799  |
| Item 12                                                    | 0.649    | 0.039 | 16.694  | < .001 | *** | 0.573  | 0.726  |
| Item 13                                                    | 0.563    | 0.050 | 11.343  | < .001 | *** | 0.466  | 0.660  |
| Item 14                                                    | 0.819    | 0.044 | 18.755  | < .001 | *** | 0.733  | 0.904  |

|                    | Estimate | S.E.  | z      | p      |     | LLCI  | ULCI  |
|--------------------|----------|-------|--------|--------|-----|-------|-------|
| Item 3             | 0.384    | 0.032 | 11.848 | < .001 | *** | 0.321 | 0.448 |
| Item 4             | 0.718    | 0.036 | 19.855 | < .001 | *** | 0.647 | 0.788 |
| Item 16            | 0.653    | 0.039 | 16.918 | < .001 | *** | 0.578 | 0.729 |
| Item 19            | 0.454    | 0.035 | 12.843 | < .001 | *** | 0.385 | 0.524 |
| Past Positive      | 1        |       |        |        |     | 1     | 1     |
| Past Negative      | 1        |       |        |        |     | 1     | 1     |
| Present Fatalistic | 1        |       |        |        |     | 1     | 1     |
| Present Hedonistic | 1        |       |        |        |     | 1     | 1     |
| Future             | 1        |       |        |        |     | 1     | 1     |

Note: \*  $p < .05$ . \*\*  $p < .01$ . \*\*\*  $p < .001$ .

Table S4. Model estimates of CFA in boys (n = 1429).

|                                     | Estimate | S.E.  | z      | p      |     | LLCI   | ULCI   |
|-------------------------------------|----------|-------|--------|--------|-----|--------|--------|
| Latent Variables:                   |          |       |        |        |     |        |        |
| Past Positive =~ Item 2             | 0.656    | 0.031 | 21.067 | < .001 | *** | 0.595  | 0.717  |
| Past Positive =~ Item 7             | 0.658    | 0.033 | 19.836 | < .001 | *** | 0.593  | 0.723  |
| Past Positive =~ Item 9             | 0.565    | 0.036 | 15.854 | < .001 | *** | 0.495  | 0.635  |
| Past Positive =~ Item 17            | 0.596    | 0.038 | 15.781 | < .001 | *** | 0.522  | 0.669  |
| Past Negative =~ Item 6             | 0.886    | 0.035 | 25.651 | < .001 | *** | 0.818  | 0.953  |
| Past Negative =~ Item 8             | 0.595    | 0.039 | 15.070 | < .001 | *** | 0.517  | 0.672  |
| Past Negative =~ Item 11            | 0.811    | 0.039 | 20.880 | < .001 | *** | 0.735  | 0.888  |
| Past Negative =~ Item 18            | 0.921    | 0.033 | 28.289 | < .001 | *** | 0.857  | 0.985  |
| Present Hedonistic =~ Item 1        | 0.609    | 0.037 | 16.324 | < .001 | *** | 0.536  | 0.683  |
| Present Hedonistic =~ Item 10       | 0.409    | 0.041 | 10.004 | < .001 | *** | 0.329  | 0.489  |
| Present Hedonistic =~ Item 15       | 0.476    | 0.039 | 12.144 | < .001 | *** | 0.399  | 0.553  |
| Present Hedonistic =~ Item 20       | 0.439    | 0.038 | 11.603 | < .001 | *** | 0.365  | 0.513  |
| Present Fatalistic =~ Item 5        | 0.510    | 0.039 | 13.142 | < .001 | *** | 0.434  | 0.586  |
| Present Fatalistic =~ Item 12       | 0.752    | 0.034 | 22.009 | < .001 | *** | 0.685  | 0.818  |
| Present Fatalistic =~ Item 13       | 0.813    | 0.035 | 23.344 | < .001 | *** | 0.744  | 0.881  |
| Present Fatalistic =~ Item 14       | 0.622    | 0.038 | 16.481 | < .001 | *** | 0.548  | 0.696  |
| Future =~ Item 3                    | 0.735    | 0.030 | 24.787 | < .001 | *** | 0.677  | 0.793  |
| Future =~ Item 4                    | 0.711    | 0.033 | 21.800 | < .001 | *** | 0.647  | 0.775  |
| Future =~ Item 16                   | 0.552    | 0.034 | 16.091 | < .001 | *** | 0.485  | 0.619  |
| Future =~ Item 19                   | 0.598    | 0.032 | 18.706 | < .001 | *** | 0.535  | 0.660  |
| Covariances:                        |          |       |        |        |     |        |        |
| Past Positive =~ Past Negative      | -0.102   | 0.040 | -2.565 | 0.010  | *   | -0.180 | -0.024 |
| Past Positive =~ Present Hedonistic | 0.733    | 0.037 | 19.988 | < .001 | *** | 0.661  | 0.805  |

|                                                            | Estimate | S.E.  | <i>z</i> | <i>p</i> |     | LLCI   | ULCI   |
|------------------------------------------------------------|----------|-------|----------|----------|-----|--------|--------|
| Past Positive $\rightleftharpoons$ Present Fatalistic      | -0.221   | 0.046 | -4.835   | < .001   | *** | -0.311 | -0.131 |
| Past Positive $\rightleftharpoons$ Future                  | 0.570    | 0.034 | 16.582   | < .001   | *** | 0.503  | 0.637  |
| Past Negative $\rightleftharpoons$ Present Hedonistic      | 0.133    | 0.049 | 2.734    | 0.006    | **  | 0.038  | 0.229  |
| Past Negative $\rightleftharpoons$ Present Fatalistic      | 0.585    | 0.033 | 17.719   | < .001   | *** | 0.520  | 0.650  |
| Past Negative $\rightleftharpoons$ Future                  | -0.281   | 0.039 | -7.155   | < .001   | *** | -0.359 | -0.204 |
| Present Hedonistic $\rightleftharpoons$ Present Fatalistic | 0.099    | 0.053 | 1.853    | 0.064    |     | -0.006 | 0.203  |
| Present Hedonistic $\rightleftharpoons$ Future             | 0.470    | 0.045 | 10.500   | < .001   | *** | 0.382  | 0.558  |
| Present Fatalistic $\rightleftharpoons$ Future             | -0.440   | 0.047 | -9.377   | < .001   | *** | -0.532 | -0.348 |
| Variances:                                                 |          |       |          |          |     |        |        |
| Item 2                                                     | 0.467    | 0.033 | 14.135   | < .001   | *** | 0.402  | 0.531  |
| Item 7                                                     | 0.675    | 0.045 | 15.043   | < .001   | *** | 0.587  | 0.763  |
| Item 9                                                     | 0.936    | 0.046 | 20.214   | < .001   | *** | 0.846  | 1.027  |
| Item 17                                                    | 1.020    | 0.052 | 19.737   | < .001   | *** | 0.919  | 1.122  |
| Item 6                                                     | 0.792    | 0.053 | 14.948   | < .001   | *** | 0.689  | 0.896  |
| Item 8                                                     | 1.102    | 0.051 | 21.660   | < .001   | *** | 1.002  | 1.201  |
| Item 11                                                    | 0.936    | 0.063 | 14.940   | < .001   | *** | 0.813  | 1.059  |
| Item 18                                                    | 0.597    | 0.050 | 11.865   | < .001   | *** | 0.498  | 0.695  |
| Item 1                                                     | 0.678    | 0.047 | 14.460   | < .001   | *** | 0.586  | 0.770  |
| Item 10                                                    | 1.105    | 0.047 | 23.574   | < .001   | *** | 1.013  | 1.197  |
| Item 15                                                    | 1.080    | 0.045 | 23.955   | < .001   | *** | 0.992  | 1.169  |
| Item 20                                                    | 0.943    | 0.045 | 21.015   | < .001   | *** | 0.855  | 1.031  |
| Item 5                                                     | 0.924    | 0.047 | 19.539   | < .001   | *** | 0.831  | 1.016  |
| Item 12                                                    | 0.733    | 0.047 | 15.540   | < .001   | *** | 0.641  | 0.826  |
| Item 13                                                    | 0.554    | 0.050 | 11.046   | < .001   | *** | 0.455  | 0.652  |
| Item 14                                                    | 0.824    | 0.048 | 17.256   | < .001   | *** | 0.730  | 0.917  |

|                    | Estimate | S.E.  | <i>z</i> | <i>p</i> |     | LLCI  | ULCI  |
|--------------------|----------|-------|----------|----------|-----|-------|-------|
| Item 3             | 0.467    | 0.035 | 13.213   | < .001   | *** | 0.398 | 0.537 |
| Item 4             | 0.672    | 0.042 | 15.901   | < .001   | *** | 0.590 | 0.755 |
| Item 16            | 0.780    | 0.045 | 17.372   | < .001   | *** | 0.692 | 0.867 |
| Item 19            | 0.608    | 0.039 | 15.575   | < .001   | *** | 0.531 | 0.684 |
| Past Positive      | 1        |       |          |          |     | 1     | 1     |
| Past Negative      | 1        |       |          |          |     | 1     | 1     |
| Present Fatalistic | 1        |       |          |          |     | 1     | 1     |
| Present Hedonistic | 1        |       |          |          |     | 1     | 1     |
| Future             | 1        |       |          |          |     | 1     | 1     |

Note: \*  $p < .05$ . \*\*  $p < .01$ . \*\*\*  $p < .001$ .

Table S5. Model estimates of CFA in girls (n = 1205).

|                                     | Estimate | S.E.  | z      | p      |     | LLCI   | ULCI  |
|-------------------------------------|----------|-------|--------|--------|-----|--------|-------|
| Latent Variables:                   |          |       |        |        |     |        |       |
| Past Positive =~ Item 2             | 0.752    | 0.035 | 21.332 | < .001 | *** | 0.683  | 0.821 |
| Past Positive =~ Item 7             | 0.585    | 0.039 | 15.057 | < .001 | *** | 0.509  | 0.661 |
| Past Positive =~ Item 9             | 0.585    | 0.042 | 13.773 | < .001 | *** | 0.502  | 0.669 |
| Past Positive =~ Item 17            | 0.785    | 0.037 | 21.008 | < .001 | *** | 0.712  | 0.859 |
| Past Negative =~ Item 6             | 0.984    | 0.030 | 32.322 | < .001 | *** | 0.924  | 1.043 |
| Past Negative =~ Item 8             | 0.585    | 0.037 | 15.685 | < .001 | *** | 0.512  | 0.658 |
| Past Negative =~ Item 11            | 0.948    | 0.032 | 29.827 | < .001 | *** | 0.886  | 1.011 |
| Past Negative =~ Item 18            | 0.966    | 0.029 | 33.556 | < .001 | *** | 0.910  | 1.023 |
| Present Hedonistic =~ Item 1        | 0.623    | 0.037 | 16.792 | < .001 | *** | 0.551  | 0.696 |
| Present Hedonistic =~ Item 10       | 0.505    | 0.043 | 11.883 | < .001 | *** | 0.422  | 0.589 |
| Present Hedonistic =~ Item 15       | 0.466    | 0.038 | 12.419 | < .001 | *** | 0.393  | 0.540 |
| Present Hedonistic =~ Item 20       | 0.462    | 0.038 | 12.162 | < .001 | *** | 0.388  | 0.537 |
| Present Fatalistic =~ Item 5        | 0.565    | 0.034 | 16.387 | < .001 | *** | 0.498  | 0.633 |
| Present Fatalistic =~ Item 12       | 0.659    | 0.035 | 18.889 | < .001 | *** | 0.591  | 0.728 |
| Present Fatalistic =~ Item 13       | 0.778    | 0.035 | 22.025 | < .001 | *** | 0.709  | 0.848 |
| Present Fatalistic =~ Item 14       | 0.449    | 0.036 | 12.481 | < .001 | *** | 0.378  | 0.520 |
| Future =~ Item 3                    | 0.687    | 0.032 | 21.772 | < .001 | *** | 0.625  | 0.749 |
| Future =~ Item 4                    | 0.534    | 0.035 | 15.316 | < .001 | *** | 0.466  | 0.602 |
| Future =~ Item 16                   | 0.488    | 0.037 | 13.363 | < .001 | *** | 0.417  | 0.560 |
| Future =~ Item 19                   | 0.644    | 0.032 | 20.439 | < .001 | *** | 0.583  | 0.706 |
| Covariances:                        |          |       |        |        |     |        |       |
| Past Positive =~ Past Negative      | -0.076   | 0.041 | -1.839 | 0.066  |     | -0.157 | 0.005 |
| Past Positive =~ Present Hedonistic | 0.568    | 0.039 | 14.590 | < .001 | *** | 0.492  | 0.645 |

|                                                            | Estimate | S.E.  | z       | p      |     | LLCI   | ULCI   |
|------------------------------------------------------------|----------|-------|---------|--------|-----|--------|--------|
| Past Positive $\rightleftharpoons$ Present Fatalistic      | -0.212   | 0.046 | -4.640  | < .001 | *** | -0.301 | -0.122 |
| Past Positive $\rightleftharpoons$ Future                  | 0.533    | 0.036 | 14.850  | < .001 | *** | 0.463  | 0.604  |
| Past Negative $\rightleftharpoons$ Present Hedonistic      | 0.145    | 0.046 | 3.170   | 0.002  | **  | 0.055  | 0.234  |
| Past Negative $\rightleftharpoons$ Present Fatalistic      | 0.682    | 0.028 | 24.130  | < .001 | *** | 0.626  | 0.737  |
| Past Negative $\rightleftharpoons$ Future                  | -0.357   | 0.037 | -9.645  | < .001 | *** | -0.429 | -0.284 |
| Present Hedonistic $\rightleftharpoons$ Present Fatalistic | 0.180    | 0.050 | 3.586   | < .001 | *** | 0.081  | 0.278  |
| Present Hedonistic $\rightleftharpoons$ Future             | 0.277    | 0.050 | 5.565   | < .001 | *** | 0.179  | 0.374  |
| Present Fatalistic $\rightleftharpoons$ Future             | -0.557   | 0.041 | -13.601 | < .001 | *** | -0.637 | -0.476 |
| Variances:                                                 |          |       |         |        |     |        |        |
| Item 2                                                     | 0.454    | 0.042 | 10.935  | < .001 | *** | 0.373  | 0.536  |
| Item 7                                                     | 0.690    | 0.047 | 14.705  | < .001 | *** | 0.598  | 0.782  |
| Item 9                                                     | 1.007    | 0.047 | 21.415  | < .001 | *** | 0.915  | 1.099  |
| Item 17                                                    | 0.762    | 0.050 | 15.335  | < .001 | *** | 0.665  | 0.860  |
| Item 6                                                     | 0.538    | 0.044 | 12.188  | < .001 | *** | 0.452  | 0.625  |
| Item 8                                                     | 0.961    | 0.050 | 19.261  | < .001 | *** | 0.863  | 1.059  |
| Item 11                                                    | 0.676    | 0.049 | 13.796  | < .001 | *** | 0.580  | 0.772  |
| Item 18                                                    | 0.558    | 0.037 | 15.056  | < .001 | *** | 0.485  | 0.630  |
| Item 1                                                     | 0.618    | 0.042 | 14.622  | < .001 | *** | 0.535  | 0.701  |
| Item 10                                                    | 0.982    | 0.049 | 20.035  | < .001 | *** | 0.886  | 1.078  |
| Item 15                                                    | 0.835    | 0.040 | 20.864  | < .001 | *** | 0.757  | 0.913  |
| Item 20                                                    | 0.916    | 0.044 | 20.597  | < .001 | *** | 0.829  | 1.003  |
| Item 5                                                     | 0.723    | 0.039 | 18.570  | < .001 | *** | 0.647  | 0.799  |
| Item 12                                                    | 0.649    | 0.039 | 16.694  | < .001 | *** | 0.573  | 0.726  |
| Item 13                                                    | 0.563    | 0.050 | 11.343  | < .001 | *** | 0.466  | 0.660  |
| Item 14                                                    | 0.819    | 0.044 | 18.755  | < .001 | *** | 0.733  | 0.904  |

|                    | Estimate | S.E.  | z      | p      |     | LLCI  | ULCI  |
|--------------------|----------|-------|--------|--------|-----|-------|-------|
| Item 3             | 0.384    | 0.032 | 11.848 | < .001 | *** | 0.321 | 0.448 |
| Item 4             | 0.718    | 0.036 | 19.855 | < .001 | *** | 0.647 | 0.788 |
| Item 16            | 0.653    | 0.039 | 16.918 | < .001 | *** | 0.578 | 0.729 |
| Item 19            | 0.454    | 0.035 | 12.843 | < .001 | *** | 0.385 | 0.524 |
| Past Positive      | 1        |       |        |        |     | 1     | 1     |
| Past Negative      | 1        |       |        |        |     | 1     | 1     |
| Present Fatalistic | 1        |       |        |        |     | 1     | 1     |
| Present Hedonistic | 1        |       |        |        |     | 1     | 1     |
| Future             | 1        |       |        |        |     | 1     | 1     |

Note: \*  $p < .05$ . \*\*  $p < .01$ . \*\*\*  $p < .001$ .

Table S6. Model fit indices for CFA and invariance models of the C-ZTPI-20 excluding the domain of Present-Fatalistic

|                             | $\chi^2$    | df  | RMSEA | CFI   | TLI   | SRMR  | $\Delta$ RMSEA | $\Delta$ CFI | $\Delta$ TLI | $\Delta$ SRMR |
|-----------------------------|-------------|-----|-------|-------|-------|-------|----------------|--------------|--------------|---------------|
| CFA total sample (n = 2634) | 1421.144*** | 98  | 0.058 | 0.928 | 0.911 | 0.058 |                |              |              |               |
| CFA Boys (n = 1429)         | 673.927***  | 98  | 0.052 | 0.937 | 0.923 | 0.056 |                |              |              |               |
| CFA Girls (n = 1205)        | 972.027***  | 98  | 0.068 | 0.913 | 0.893 | 0.068 |                |              |              |               |
| Configural Model            | 1638.639*** | 196 | 0.060 | 0.925 | 0.908 | 0.058 |                |              |              |               |
| Metric Model                | 1585.662*** | 208 | 0.059 | 0.922 | 0.910 | 0.059 | -0.001         | -0.003       | 0.002        | 0.001         |
| Scalar Model                | 1782.197*** | 220 | 0.061 | 0.911 | 0.903 | 0.062 | 0.002          | -0.010       | -0.006       | 0.003         |
| Strict Model                | 1868.964*** | 236 | 0.061 | 0.907 | 0.906 | 0.064 | -0.001         | -0.004       | 0.002        | 0.002         |

Note: \*\*\*  $p < .001$ .

Table S7. Coefficients of each edge in the network model of total sample (n = 2634).

|    | Relation         | <i>Post.mean</i> | <i>Post.sd</i> | <i>Cred.lb</i> | <i>Cred.ub</i> |
|----|------------------|------------------|----------------|----------------|----------------|
| 1  | Item 2--Item 7   | 0.248            | 0.018          | 0.213          | 0.284          |
| 2  | Item 2--Item 9   | 0.391            | 0.017          | 0.357          | 0.422          |
| 3  | Item 7--Item 9   | 0.138            | 0.019          | 0.1            | 0.175          |
| 4  | Item 2--Item 17  | 0.086            | 0.02           | 0.048          | 0.125          |
| 5  | Item 7--Item 17  | 0.05             | 0.02           | 0.012          | 0.09           |
| 6  | Item 9--Item 17  | 0.102            | 0.019          | 0.064          | 0.14           |
| 7  | Item 2--Item 6   | -0.041           | 0.02           | -0.08          | -0.003         |
| 8  | Item 7--Item 6   | 0.01             | 0.019          | -0.028         | 0.047          |
| 9  | Item 9--Item 6   | 0.038            | 0.02           | -0.001         | 0.076          |
| 10 | Item 17--Item 6  | 0.007            | 0.02           | -0.031         | 0.046          |
| 11 | Item 2--Item 8   | 0.004            | 0.019          | -0.034         | 0.041          |
| 12 | Item 7--Item 8   | 0.03             | 0.019          | -0.007         | 0.068          |
| 13 | Item 9--Item 8   | 0.002            | 0.019          | -0.036         | 0.04           |
| 14 | Item 17--Item 8  | -0.013           | 0.02           | -0.051         | 0.026          |
| 15 | Item 6--Item 8   | 0.101            | 0.02           | 0.061          | 0.139          |
| 16 | Item 2--Item 11  | -0.012           | 0.019          | -0.05          | 0.026          |
| 17 | Item 7--Item 11  | 0.005            | 0.02           | -0.034         | 0.043          |
| 18 | Item 9--Item 11  | 0.062            | 0.02           | 0.023          | 0.101          |
| 19 | Item 17--Item 11 | -0.009           | 0.02           | -0.048         | 0.03           |
| 20 | Item 6--Item 11  | 0.22             | 0.019          | 0.184          | 0.257          |
| 21 | Item 8--Item 11  | 0.042            | 0.02           | 0.002          | 0.08           |
| 22 | Item 2--Item 18  | 0.02             | 0.019          | -0.018         | 0.058          |
| 23 | Item 7--Item 18  | -0.061           | 0.019          | -0.098         | -0.023         |
| 24 | Item 9--Item 18  | 0.016            | 0.02           | -0.023         | 0.054          |
| 25 | Item 17--Item 18 | -0.014           | 0.02           | -0.052         | 0.024          |
| 26 | Item 6--Item 18  | 0.445            | 0.016          | 0.414          | 0.475          |
| 27 | Item 8--Item 18  | 0.095            | 0.019          | 0.058          | 0.133          |
| 28 | Item 11--Item 18 | 0.297            | 0.018          | 0.262          | 0.332          |
| 29 | Item 2--Item 1   | 0.277            | 0.018          | 0.241          | 0.311          |
| 30 | Item 7--Item 1   | 0.052            | 0.019          | 0.015          | 0.09           |
| 31 | Item 9--Item 1   | -0.023           | 0.019          | -0.061         | 0.015          |
| 32 | Item 17--Item 1  | 0.152            | 0.019          | 0.114          | 0.19           |
| 33 | Item 6--Item 1   | -0.048           | 0.019          | -0.085         | -0.01          |
| 34 | Item 8--Item 1   | -0.012           | 0.02           | -0.05          | 0.027          |
| 35 | Item 11--Item 1  | -0.003           | 0.019          | -0.04          | 0.036          |
| 36 | Item 18--Item 1  | -0.013           | 0.02           | -0.051         | 0.025          |
| 37 | Item 2--Item 10  | -0.06            | 0.019          | -0.097         | -0.022         |
| 38 | Item 7--Item 10  | 0.043            | 0.019          | 0.004          | 0.08           |
| 39 | Item 9--Item 10  | 0.136            | 0.019          | 0.099          | 0.173          |
| 40 | Item 17--Item 10 | -0.005           | 0.019          | -0.042         | 0.033          |
| 41 | Item 6--Item 10  | -0.055           | 0.019          | -0.092         | -0.017         |
| 42 | Item 8--Item 10  | 0.118            | 0.019          | 0.079          | 0.155          |

|    |                  |        |       |        |        |
|----|------------------|--------|-------|--------|--------|
| 43 | Item 11--Item 10 | 0.02   | 0.02  | -0.018 | 0.059  |
| 44 | Item 18--Item 10 | 0.02   | 0.02  | -0.018 | 0.059  |
| 45 | Item 1--Item 10  | 0.074  | 0.02  | 0.035  | 0.113  |
| 46 | Item 2--Item 15  | 0.04   | 0.019 | 0.004  | 0.078  |
| 47 | Item 7--Item 15  | 0.002  | 0.019 | -0.036 | 0.04   |
| 48 | Item 9--Item 15  | -0.043 | 0.019 | -0.081 | -0.005 |
| 49 | Item 17--Item 15 | 0.07   | 0.02  | 0.031  | 0.108  |
| 50 | Item 6--Item 15  | 0.004  | 0.02  | -0.035 | 0.041  |
| 51 | Item 8--Item 15  | 0.062  | 0.02  | 0.022  | 0.102  |
| 52 | Item 11--Item 15 | 0.034  | 0.02  | -0.005 | 0.073  |
| 53 | Item 18--Item 15 | 0.001  | 0.02  | -0.037 | 0.039  |
| 54 | Item 1--Item 15  | 0.036  | 0.02  | -0.002 | 0.075  |
| 55 | Item 10--Item 15 | 0.338  | 0.017 | 0.304  | 0.371  |
| 56 | Item 2--Item 20  | 0.012  | 0.02  | -0.026 | 0.05   |
| 57 | Item 7--Item 20  | 0.072  | 0.02  | 0.034  | 0.111  |
| 58 | Item 9--Item 20  | -0.057 | 0.019 | -0.094 | -0.019 |
| 59 | Item 17--Item 20 | 0.036  | 0.019 | -0.002 | 0.074  |
| 60 | Item 6--Item 20  | 0.063  | 0.02  | 0.024  | 0.101  |
| 61 | Item 8--Item 20  | 0.002  | 0.02  | -0.035 | 0.042  |
| 62 | Item 11--Item 20 | -0.016 | 0.019 | -0.053 | 0.022  |
| 63 | Item 18--Item 20 | 0.051  | 0.02  | 0.013  | 0.088  |
| 64 | Item 1--Item 20  | 0.161  | 0.019 | 0.123  | 0.198  |
| 65 | Item 10--Item 20 | 0.02   | 0.02  | -0.018 | 0.057  |
| 66 | Item 15--Item 20 | 0.177  | 0.019 | 0.138  | 0.214  |
| 67 | Item 2--Item 5   | -0.012 | 0.02  | -0.051 | 0.027  |
| 68 | Item 7--Item 5   | 0.021  | 0.02  | -0.017 | 0.06   |
| 69 | Item 9--Item 5   | -0.032 | 0.02  | -0.072 | 0.007  |
| 70 | Item 17--Item 5  | -0.029 | 0.02  | -0.067 | 0.009  |
| 71 | Item 6--Item 5   | 0.016  | 0.02  | -0.022 | 0.054  |
| 72 | Item 8--Item 5   | 0.095  | 0.019 | 0.057  | 0.133  |
| 73 | Item 11--Item 5  | 0.044  | 0.019 | 0.006  | 0.082  |
| 74 | Item 18--Item 5  | -0.019 | 0.02  | -0.058 | 0.02   |
| 75 | Item 1--Item 5   | -0.03  | 0.02  | -0.068 | 0.008  |
| 76 | Item 10--Item 5  | 0.054  | 0.019 | 0.017  | 0.092  |
| 77 | Item 15--Item 5  | 0.038  | 0.02  | -0.001 | 0.078  |
| 78 | Item 20--Item 5  | -0.007 | 0.02  | -0.046 | 0.032  |
| 79 | Item 2--Item 12  | 0.014  | 0.02  | -0.024 | 0.052  |
| 80 | Item 7--Item 12  | 0.006  | 0.019 | -0.031 | 0.044  |
| 81 | Item 9--Item 12  | 0.019  | 0.019 | -0.019 | 0.057  |
| 82 | Item 17--Item 12 | -0.023 | 0.019 | -0.061 | 0.014  |
| 83 | Item 6--Item 12  | -0.03  | 0.019 | -0.067 | 0.008  |
| 84 | Item 8--Item 12  | 0.023  | 0.019 | -0.015 | 0.061  |
| 85 | Item 11--Item 12 | 0.14   | 0.019 | 0.102  | 0.176  |
| 86 | Item 18--Item 12 | 0.035  | 0.02  | -0.004 | 0.074  |

|     |                  |        |       |        |        |
|-----|------------------|--------|-------|--------|--------|
| 87  | Item 1--Item 12  | 0.07   | 0.02  | 0.031  | 0.108  |
| 88  | Item 10--Item 12 | 0.064  | 0.02  | 0.025  | 0.103  |
| 89  | Item 15--Item 12 | -0.055 | 0.02  | -0.093 | -0.016 |
| 90  | Item 20--Item 12 | 0.046  | 0.02  | 0.007  | 0.084  |
| 91  | Item 5--Item 12  | 0.094  | 0.02  | 0.056  | 0.132  |
| 92  | Item 2--Item 13  | -0.053 | 0.019 | -0.09  | -0.014 |
| 93  | Item 7--Item 13  | -0.033 | 0.019 | -0.071 | 0.006  |
| 94  | Item 9--Item 13  | 0.01   | 0.019 | -0.029 | 0.047  |
| 95  | Item 17--Item 13 | 0.058  | 0.02  | 0.019  | 0.096  |
| 96  | Item 6--Item 13  | 0.095  | 0.02  | 0.057  | 0.134  |
| 97  | Item 8--Item 13  | 0.108  | 0.019 | 0.07   | 0.144  |
| 98  | Item 11--Item 13 | 0.085  | 0.019 | 0.048  | 0.123  |
| 99  | Item 18--Item 13 | 0.075  | 0.019 | 0.036  | 0.113  |
| 100 | Item 1--Item 13  | 0.003  | 0.019 | -0.035 | 0.039  |
| 101 | Item 10--Item 13 | 0.056  | 0.019 | 0.018  | 0.093  |
| 102 | Item 15--Item 13 | -0.016 | 0.02  | -0.054 | 0.022  |
| 103 | Item 20--Item 13 | 0.002  | 0.019 | -0.036 | 0.04   |
| 104 | Item 5--Item 13  | 0.073  | 0.019 | 0.035  | 0.111  |
| 105 | Item 12--Item 13 | 0.288  | 0.018 | 0.253  | 0.321  |
| 106 | Item 2--Item 14  | 0.008  | 0.019 | -0.03  | 0.047  |
| 107 | Item 7--Item 14  | -0.079 | 0.02  | -0.117 | -0.041 |
| 108 | Item 9--Item 14  | 0.016  | 0.019 | -0.022 | 0.054  |
| 109 | Item 17--Item 14 | -0.012 | 0.02  | -0.051 | 0.027  |
| 110 | Item 6--Item 14  | 0.034  | 0.019 | -0.004 | 0.073  |
| 111 | Item 8--Item 14  | -0.004 | 0.02  | -0.044 | 0.034  |
| 112 | Item 11--Item 14 | -0.042 | 0.019 | -0.08  | -0.004 |
| 113 | Item 18--Item 14 | -0.005 | 0.019 | -0.043 | 0.031  |
| 114 | Item 1--Item 14  | 0.003  | 0.019 | -0.035 | 0.042  |
| 115 | Item 10--Item 14 | -0.03  | 0.02  | -0.069 | 0.009  |
| 116 | Item 15--Item 14 | 0.112  | 0.019 | 0.075  | 0.149  |
| 117 | Item 20--Item 14 | 0.032  | 0.02  | -0.007 | 0.071  |
| 118 | Item 5--Item 14  | 0.314  | 0.018 | 0.278  | 0.349  |
| 119 | Item 12--Item 14 | 0.111  | 0.019 | 0.074  | 0.149  |
| 120 | Item 13--Item 14 | 0.166  | 0.019 | 0.128  | 0.202  |
| 121 | Item 2--Item 3   | 0.187  | 0.019 | 0.15   | 0.224  |
| 122 | Item 7--Item 3   | 0.007  | 0.02  | -0.03  | 0.046  |
| 123 | Item 9--Item 3   | -0.007 | 0.019 | -0.045 | 0.031  |
| 124 | Item 17--Item 3  | 0.023  | 0.02  | -0.016 | 0.062  |
| 125 | Item 6--Item 3   | 0.002  | 0.02  | -0.036 | 0.04   |
| 126 | Item 8--Item 3   | -0.005 | 0.02  | -0.043 | 0.034  |
| 127 | Item 11--Item 3  | 0.053  | 0.02  | 0.014  | 0.092  |
| 128 | Item 18--Item 3  | -0.03  | 0.02  | -0.067 | 0.008  |
| 129 | Item 1--Item 3   | 0.08   | 0.019 | 0.042  | 0.117  |
| 130 | Item 10--Item 3  | 0.071  | 0.02  | 0.032  | 0.108  |

|     |                  |        |       |        |        |
|-----|------------------|--------|-------|--------|--------|
| 131 | Item 15--Item 3  | 0.056  | 0.02  | 0.017  | 0.094  |
| 132 | Item 20--Item 3  | 0.033  | 0.02  | -0.007 | 0.071  |
| 133 | Item 5--Item 3   | -0.019 | 0.019 | -0.056 | 0.019  |
| 134 | Item 12--Item 3  | -0.126 | 0.019 | -0.163 | -0.088 |
| 135 | Item 13--Item 3  | -0.01  | 0.02  | -0.049 | 0.03   |
| 136 | Item 14--Item 3  | -0.052 | 0.02  | -0.091 | -0.013 |
| 137 | Item 2--Item 4   | -0.023 | 0.019 | -0.061 | 0.014  |
| 138 | Item 7--Item 4   | 0.022  | 0.019 | -0.017 | 0.06   |
| 139 | Item 9--Item 4   | 0.03   | 0.02  | -0.009 | 0.069  |
| 140 | Item 17--Item 4  | 0.022  | 0.02  | -0.017 | 0.06   |
| 141 | Item 6--Item 4   | 0.003  | 0.02  | -0.036 | 0.042  |
| 142 | Item 8--Item 4   | -0.048 | 0.02  | -0.087 | -0.01  |
| 143 | Item 11--Item 4  | 0.022  | 0.02  | -0.015 | 0.061  |
| 144 | Item 18--Item 4  | -0.067 | 0.019 | -0.103 | -0.029 |
| 145 | Item 1--Item 4   | 0.041  | 0.019 | 0.003  | 0.079  |
| 146 | Item 10--Item 4  | -0.038 | 0.02  | -0.077 | 0.001  |
| 147 | Item 15--Item 4  | -0.025 | 0.02  | -0.064 | 0.014  |
| 148 | Item 20--Item 4  | -0.026 | 0.02  | -0.065 | 0.013  |
| 149 | Item 5--Item 4   | 0.017  | 0.019 | -0.021 | 0.056  |
| 150 | Item 12--Item 4  | -0.036 | 0.02  | -0.075 | 0.002  |
| 151 | Item 13--Item 4  | -0.021 | 0.019 | -0.059 | 0.018  |
| 152 | Item 14--Item 4  | 0.011  | 0.019 | -0.027 | 0.049  |
| 153 | Item 3--Item 4   | 0.247  | 0.019 | 0.21   | 0.284  |
| 154 | Item 2--Item 16  | -0.014 | 0.019 | -0.052 | 0.024  |
| 155 | Item 7--Item 16  | -0.015 | 0.019 | -0.052 | 0.025  |
| 156 | Item 9--Item 16  | -0.004 | 0.019 | -0.042 | 0.034  |
| 157 | Item 17--Item 16 | 0.073  | 0.02  | 0.034  | 0.11   |
| 158 | Item 6--Item 16  | -0.032 | 0.019 | -0.07  | 0.005  |
| 159 | Item 8--Item 16  | -0.04  | 0.019 | -0.078 | -0.002 |
| 160 | Item 11--Item 16 | -0.019 | 0.019 | -0.056 | 0.019  |
| 161 | Item 18--Item 16 | -0.003 | 0.02  | -0.043 | 0.035  |
| 162 | Item 1--Item 16  | -0.027 | 0.019 | -0.065 | 0.01   |
| 163 | Item 10--Item 16 | 0.032  | 0.019 | -0.006 | 0.071  |
| 164 | Item 15--Item 16 | 0.062  | 0.02  | 0.024  | 0.101  |
| 165 | Item 20--Item 16 | 0.019  | 0.02  | -0.019 | 0.058  |
| 166 | Item 5--Item 16  | -0.002 | 0.02  | -0.041 | 0.035  |
| 167 | Item 12--Item 16 | -0.048 | 0.019 | -0.085 | -0.01  |
| 168 | Item 13--Item 16 | -0.014 | 0.019 | -0.051 | 0.024  |
| 169 | Item 14--Item 16 | -0.013 | 0.02  | -0.051 | 0.025  |
| 170 | Item 3--Item 16  | 0.106  | 0.019 | 0.069  | 0.143  |
| 171 | Item 4--Item 16  | 0.225  | 0.018 | 0.189  | 0.261  |
| 172 | Item 2--Item 19  | -0.057 | 0.02  | -0.095 | -0.019 |
| 173 | Item 7--Item 19  | 0.114  | 0.019 | 0.077  | 0.152  |
| 174 | Item 9--Item 19  | 0.018  | 0.019 | -0.02  | 0.057  |

|     |                  |        |       |        |        |
|-----|------------------|--------|-------|--------|--------|
| 175 | Item 17--Item 19 | 0.17   | 0.019 | 0.133  | 0.208  |
| 176 | Item 6--Item 19  | -0.021 | 0.02  | -0.061 | 0.017  |
| 177 | Item 8--Item 19  | -0.018 | 0.02  | -0.057 | 0.02   |
| 178 | Item 11--Item 19 | -0.046 | 0.019 | -0.084 | -0.008 |
| 179 | Item 18--Item 19 | 0.051  | 0.019 | 0.013  | 0.088  |
| 180 | Item 1--Item 19  | -0.028 | 0.02  | -0.066 | 0.012  |
| 181 | Item 10--Item 19 | -0.004 | 0.019 | -0.043 | 0.033  |
| 182 | Item 15--Item 19 | 0.011  | 0.019 | -0.026 | 0.05   |
| 183 | Item 20--Item 19 | 0.074  | 0.02  | 0.036  | 0.113  |
| 184 | Item 5--Item 19  | -0.06  | 0.019 | -0.099 | -0.022 |
| 185 | Item 12--Item 19 | -0.02  | 0.019 | -0.059 | 0.019  |
| 186 | Item 13--Item 19 | -0.041 | 0.019 | -0.078 | -0.003 |
| 187 | Item 14--Item 19 | -0.029 | 0.02  | -0.067 | 0.009  |
| 188 | Item 3--Item 19  | 0.226  | 0.019 | 0.188  | 0.262  |
| 189 | Item 4--Item 19  | 0.153  | 0.019 | 0.115  | 0.191  |
| 190 | Item 16--Item 19 | 0.16   | 0.019 | 0.122  | 0.198  |

---

Note: *Post.mean* refers to posterior mean, *Post.sd* refers to posterior standard deviation, *Cred.lb* refers to the lower bound of 95% credible interval, *Cred.ub* refers to the upper bound of 95% credible interval.

Table S8. Coefficients of each edge in the network model of boys (n = 1429).

|    | Relation         | <i>Post.mean</i> | <i>Post.sd</i> | <i>Cred.lb</i> | <i>Cred.ub</i> |
|----|------------------|------------------|----------------|----------------|----------------|
| 1  | Item 2--Item 7   | 0.25             | 0.025          | 0.202          | 0.298          |
| 2  | Item 2--Item 9   | 0.352            | 0.023          | 0.305          | 0.396          |
| 3  | Item 7--Item 9   | 0.163            | 0.026          | 0.112          | 0.214          |
| 4  | Item 2--Item 17  | 0.043            | 0.027          | -0.009         | 0.096          |
| 5  | Item 7--Item 17  | 0.068            | 0.027          | 0.016          | 0.122          |
| 6  | Item 9--Item 17  | 0.072            | 0.026          | 0.02           | 0.124          |
| 7  | Item 2--Item 6   | -0.018           | 0.027          | -0.07          | 0.035          |
| 8  | Item 7--Item 6   | 0.032            | 0.026          | -0.02          | 0.083          |
| 9  | Item 9--Item 6   | -0.004           | 0.027          | -0.058         | 0.047          |
| 10 | Item 17--Item 6  | -0.016           | 0.027          | -0.069         | 0.037          |
| 11 | Item 2--Item 8   | -0.013           | 0.026          | -0.065         | 0.038          |
| 12 | Item 7--Item 8   | 0.02             | 0.026          | -0.03          | 0.072          |
| 13 | Item 9--Item 8   | 0.001            | 0.026          | -0.051         | 0.053          |
| 14 | Item 17--Item 8  | 0.032            | 0.027          | -0.02          | 0.085          |
| 15 | Item 6--Item 8   | 0.104            | 0.027          | 0.05           | 0.156          |
| 16 | Item 2--Item 11  | -0.004           | 0.027          | -0.056         | 0.047          |
| 17 | Item 7--Item 11  | 0.005            | 0.027          | -0.047         | 0.058          |
| 18 | Item 9--Item 11  | 0.03             | 0.027          | -0.023         | 0.083          |
| 19 | Item 17--Item 11 | -0.03            | 0.027          | -0.083         | 0.023          |
| 20 | Item 6--Item 11  | 0.199            | 0.026          | 0.149          | 0.25           |
| 21 | Item 8--Item 11  | 0.044            | 0.027          | -0.01          | 0.095          |
| 22 | Item 2--Item 18  | 0.018            | 0.026          | -0.034         | 0.07           |
| 23 | Item 7--Item 18  | -0.067           | 0.026          | -0.117         | -0.015         |
| 24 | Item 9--Item 18  | 0.048            | 0.027          | -0.005         | 0.1            |
| 25 | Item 17--Item 18 | -0.036           | 0.027          | -0.088         | 0.016          |
| 26 | Item 6--Item 18  | 0.405            | 0.022          | 0.361          | 0.447          |
| 27 | Item 8--Item 18  | 0.118            | 0.026          | 0.067          | 0.169          |
| 28 | Item 11--Item 18 | 0.296            | 0.024          | 0.248          | 0.344          |
| 29 | Item 2--Item 1   | 0.291            | 0.025          | 0.243          | 0.338          |
| 30 | Item 7--Item 1   | 0.027            | 0.027          | -0.025         | 0.078          |
| 31 | Item 9--Item 1   | -0.007           | 0.027          | -0.059         | 0.045          |
| 32 | Item 17--Item 1  | 0.146            | 0.027          | 0.093          | 0.197          |
| 33 | Item 6--Item 1   | -0.021           | 0.027          | -0.072         | 0.031          |
| 34 | Item 8--Item 1   | -0.022           | 0.027          | -0.073         | 0.032          |
| 35 | Item 11--Item 1  | 0.031            | 0.026          | -0.019         | 0.085          |
| 36 | Item 18--Item 1  | -0.041           | 0.027          | -0.093         | 0.012          |
| 37 | Item 2--Item 10  | -0.062           | 0.026          | -0.113         | -0.011         |
| 38 | Item 7--Item 10  | 0.055            | 0.026          | 0.002          | 0.106          |
| 39 | Item 9--Item 10  | 0.119            | 0.026          | 0.068          | 0.17           |
| 40 | Item 17--Item 10 | 0.04             | 0.026          | -0.011         | 0.092          |
| 41 | Item 6--Item 10  | -0.035           | 0.026          | -0.086         | 0.017          |
| 42 | Item 8--Item 10  | 0.075            | 0.027          | 0.021          | 0.126          |

|    |                  |        |       |        |        |
|----|------------------|--------|-------|--------|--------|
| 43 | Item 11--Item 10 | 0.041  | 0.027 | -0.011 | 0.094  |
| 44 | Item 18--Item 10 | 0.027  | 0.027 | -0.025 | 0.08   |
| 45 | Item 1--Item 10  | 0.054  | 0.027 | 0      | 0.107  |
| 46 | Item 2--Item 15  | 0.045  | 0.026 | -0.006 | 0.096  |
| 47 | Item 7--Item 15  | -0.027 | 0.026 | -0.078 | 0.025  |
| 48 | Item 9--Item 15  | -0.012 | 0.027 | -0.064 | 0.04   |
| 49 | Item 17--Item 15 | 0.085  | 0.027 | 0.033  | 0.136  |
| 50 | Item 6--Item 15  | 0.009  | 0.027 | -0.045 | 0.06   |
| 51 | Item 8--Item 15  | 0.064  | 0.027 | 0.01   | 0.118  |
| 52 | Item 11--Item 15 | 0.015  | 0.027 | -0.037 | 0.068  |
| 53 | Item 18--Item 15 | 0.001  | 0.027 | -0.051 | 0.053  |
| 54 | Item 1--Item 15  | 0.033  | 0.027 | -0.018 | 0.086  |
| 55 | Item 10--Item 15 | 0.329  | 0.024 | 0.282  | 0.375  |
| 56 | Item 2--Item 20  | 0.075  | 0.027 | 0.022  | 0.126  |
| 57 | Item 7--Item 20  | 0.1    | 0.027 | 0.049  | 0.153  |
| 58 | Item 9--Item 20  | -0.085 | 0.026 | -0.135 | -0.034 |
| 59 | Item 17--Item 20 | 0.035  | 0.026 | -0.019 | 0.088  |
| 60 | Item 6--Item 20  | 0.034  | 0.027 | -0.019 | 0.085  |
| 61 | Item 8--Item 20  | 0.039  | 0.027 | -0.012 | 0.092  |
| 62 | Item 11--Item 20 | -0.008 | 0.026 | -0.058 | 0.044  |
| 63 | Item 18--Item 20 | 0.059  | 0.027 | 0.007  | 0.111  |
| 64 | Item 1--Item 20  | 0.124  | 0.026 | 0.072  | 0.176  |
| 65 | Item 10--Item 20 | -0.037 | 0.027 | -0.088 | 0.014  |
| 66 | Item 15--Item 20 | 0.183  | 0.026 | 0.131  | 0.233  |
| 67 | Item 2--Item 5   | 0.029  | 0.027 | -0.024 | 0.082  |
| 68 | Item 7--Item 5   | 0.002  | 0.027 | -0.049 | 0.056  |
| 69 | Item 9--Item 5   | -0.038 | 0.027 | -0.093 | 0.015  |
| 70 | Item 17--Item 5  | 0.005  | 0.027 | -0.046 | 0.057  |
| 71 | Item 6--Item 5   | 0.027  | 0.027 | -0.025 | 0.079  |
| 72 | Item 8--Item 5   | 0.067  | 0.026 | 0.015  | 0.119  |
| 73 | Item 11--Item 5  | 0.074  | 0.026 | 0.022  | 0.125  |
| 74 | Item 18--Item 5  | -0.087 | 0.027 | -0.14  | -0.035 |
| 75 | Item 1--Item 5   | -0.05  | 0.027 | -0.101 | 0.002  |
| 76 | Item 10--Item 5  | 0.051  | 0.027 | 0      | 0.102  |
| 77 | Item 15--Item 5  | 0.026  | 0.027 | -0.027 | 0.08   |
| 78 | Item 20--Item 5  | -0.006 | 0.027 | -0.059 | 0.048  |
| 79 | Item 2--Item 12  | -0.023 | 0.027 | -0.074 | 0.029  |
| 80 | Item 7--Item 12  | 0.009  | 0.027 | -0.043 | 0.06   |
| 81 | Item 9--Item 12  | 0.038  | 0.026 | -0.013 | 0.09   |
| 82 | Item 17--Item 12 | -0.014 | 0.026 | -0.065 | 0.037  |
| 83 | Item 6--Item 12  | -0.014 | 0.026 | -0.065 | 0.037  |
| 84 | Item 8--Item 12  | 0.014  | 0.026 | -0.037 | 0.065  |
| 85 | Item 11--Item 12 | 0.126  | 0.026 | 0.073  | 0.176  |
| 86 | Item 18--Item 12 | 0.018  | 0.027 | -0.036 | 0.07   |

|     |                  |        |       |        |        |
|-----|------------------|--------|-------|--------|--------|
| 87  | Item 1--Item 12  | 0.092  | 0.027 | 0.038  | 0.143  |
| 88  | Item 10--Item 12 | 0.07   | 0.027 | 0.017  | 0.122  |
| 89  | Item 15--Item 12 | -0.062 | 0.027 | -0.114 | -0.009 |
| 90  | Item 20--Item 12 | 0.047  | 0.027 | -0.007 | 0.098  |
| 91  | Item 5--Item 12  | 0.095  | 0.027 | 0.043  | 0.147  |
| 92  | Item 2--Item 13  | -0.015 | 0.026 | -0.066 | 0.038  |
| 93  | Item 7--Item 13  | -0.072 | 0.026 | -0.123 | -0.019 |
| 94  | Item 9--Item 13  | -0.008 | 0.027 | -0.06  | 0.044  |
| 95  | Item 17--Item 13 | 0.059  | 0.027 | 0.006  | 0.111  |
| 96  | Item 6--Item 13  | 0.075  | 0.027 | 0.022  | 0.127  |
| 97  | Item 8--Item 13  | 0.109  | 0.026 | 0.057  | 0.158  |
| 98  | Item 11--Item 13 | 0.05   | 0.026 | -0.001 | 0.102  |
| 99  | Item 18--Item 13 | 0.108  | 0.026 | 0.056  | 0.159  |
| 100 | Item 1--Item 13  | 0      | 0.026 | -0.051 | 0.05   |
| 101 | Item 10--Item 13 | 0.016  | 0.027 | -0.035 | 0.068  |
| 102 | Item 15--Item 13 | 0.023  | 0.027 | -0.028 | 0.075  |
| 103 | Item 20--Item 13 | -0.046 | 0.026 | -0.097 | 0.006  |
| 104 | Item 5--Item 13  | 0.076  | 0.026 | 0.024  | 0.128  |
| 105 | Item 12--Item 13 | 0.319  | 0.024 | 0.272  | 0.363  |
| 106 | Item 2--Item 14  | -0.021 | 0.026 | -0.072 | 0.032  |
| 107 | Item 7--Item 14  | -0.069 | 0.027 | -0.121 | -0.017 |
| 108 | Item 9--Item 14  | 0.03   | 0.026 | -0.022 | 0.082  |
| 109 | Item 17--Item 14 | -0.023 | 0.027 | -0.077 | 0.03   |
| 110 | Item 6--Item 14  | 0.026  | 0.027 | -0.026 | 0.079  |
| 111 | Item 8--Item 14  | -0.007 | 0.027 | -0.061 | 0.045  |
| 112 | Item 11--Item 14 | -0.02  | 0.027 | -0.072 | 0.032  |
| 113 | Item 18--Item 14 | 0.034  | 0.026 | -0.018 | 0.085  |
| 114 | Item 1--Item 14  | -0.037 | 0.027 | -0.09  | 0.015  |
| 115 | Item 10--Item 14 | -0.009 | 0.027 | -0.062 | 0.043  |
| 116 | Item 15--Item 14 | 0.142  | 0.026 | 0.091  | 0.192  |
| 117 | Item 20--Item 14 | 0.041  | 0.027 | -0.012 | 0.094  |
| 118 | Item 5--Item 14  | 0.328  | 0.024 | 0.28   | 0.375  |
| 119 | Item 12--Item 14 | 0.135  | 0.026 | 0.084  | 0.186  |
| 120 | Item 13--Item 14 | 0.155  | 0.026 | 0.104  | 0.204  |
| 121 | Item 2--Item 3   | 0.143  | 0.026 | 0.092  | 0.194  |
| 122 | Item 7--Item 3   | 0.038  | 0.027 | -0.014 | 0.09   |
| 123 | Item 9--Item 3   | 0.009  | 0.026 | -0.044 | 0.061  |
| 124 | Item 17--Item 3  | 0.016  | 0.027 | -0.039 | 0.068  |
| 125 | Item 6--Item 3   | 0.025  | 0.026 | -0.027 | 0.076  |
| 126 | Item 8--Item 3   | 0.016  | 0.027 | -0.037 | 0.069  |
| 127 | Item 11--Item 3  | 0.08   | 0.027 | 0.028  | 0.131  |
| 128 | Item 18--Item 3  | -0.069 | 0.026 | -0.119 | -0.016 |
| 129 | Item 1--Item 3   | 0.086  | 0.026 | 0.033  | 0.136  |
| 130 | Item 10--Item 3  | 0.088  | 0.027 | 0.034  | 0.139  |

|     |                  |        |       |        |        |
|-----|------------------|--------|-------|--------|--------|
| 131 | Item 15--Item 3  | 0.065  | 0.027 | 0.013  | 0.117  |
| 132 | Item 20--Item 3  | 0.014  | 0.027 | -0.039 | 0.065  |
| 133 | Item 5--Item 3   | -0.048 | 0.026 | -0.098 | 0.005  |
| 134 | Item 12--Item 3  | -0.129 | 0.026 | -0.179 | -0.077 |
| 135 | Item 13--Item 3  | 0.029  | 0.027 | -0.024 | 0.082  |
| 136 | Item 14--Item 3  | -0.047 | 0.027 | -0.098 | 0.007  |
| 137 | Item 2--Item 4   | -0.003 | 0.026 | -0.054 | 0.049  |
| 138 | Item 7--Item 4   | 0.01   | 0.026 | -0.042 | 0.062  |
| 139 | Item 9--Item 4   | 0.058  | 0.027 | 0.005  | 0.111  |
| 140 | Item 17--Item 4  | 0.005  | 0.027 | -0.048 | 0.057  |
| 141 | Item 6--Item 4   | -0.019 | 0.027 | -0.072 | 0.033  |
| 142 | Item 8--Item 4   | -0.053 | 0.027 | -0.105 | -0.001 |
| 143 | Item 11--Item 4  | 0.005  | 0.027 | -0.046 | 0.058  |
| 144 | Item 18--Item 4  | -0.033 | 0.026 | -0.083 | 0.017  |
| 145 | Item 1--Item 4   | 0.062  | 0.026 | 0.009  | 0.114  |
| 146 | Item 10--Item 4  | 0.026  | 0.027 | -0.026 | 0.079  |
| 147 | Item 15--Item 4  | -0.062 | 0.027 | -0.115 | -0.01  |
| 148 | Item 20--Item 4  | -0.032 | 0.027 | -0.085 | 0.02   |
| 149 | Item 5--Item 4   | 0.051  | 0.026 | 0      | 0.104  |
| 150 | Item 12--Item 4  | -0.02  | 0.027 | -0.072 | 0.033  |
| 151 | Item 13--Item 4  | -0.068 | 0.026 | -0.12  | -0.015 |
| 152 | Item 14--Item 4  | -0.003 | 0.026 | -0.055 | 0.048  |
| 153 | Item 3--Item 4   | 0.266  | 0.025 | 0.216  | 0.314  |
| 154 | Item 2--Item 16  | 0.043  | 0.026 | -0.008 | 0.096  |
| 155 | Item 7--Item 16  | -0.022 | 0.026 | -0.073 | 0.031  |
| 156 | Item 9--Item 16  | -0.012 | 0.026 | -0.064 | 0.039  |
| 157 | Item 17--Item 16 | 0.122  | 0.026 | 0.069  | 0.174  |
| 158 | Item 6--Item 16  | -0.013 | 0.026 | -0.067 | 0.038  |
| 159 | Item 8--Item 16  | -0.037 | 0.026 | -0.087 | 0.015  |
| 160 | Item 11--Item 16 | -0.011 | 0.026 | -0.062 | 0.041  |
| 161 | Item 18--Item 16 | -0.027 | 0.027 | -0.081 | 0.026  |
| 162 | Item 1--Item 16  | -0.049 | 0.027 | -0.101 | 0.002  |
| 163 | Item 10--Item 16 | -0.026 | 0.027 | -0.077 | 0.027  |
| 164 | Item 15--Item 16 | 0.068  | 0.027 | 0.017  | 0.12   |
| 165 | Item 20--Item 16 | 0.033  | 0.027 | -0.019 | 0.086  |
| 166 | Item 5--Item 16  | -0.056 | 0.027 | -0.109 | -0.005 |
| 167 | Item 12--Item 16 | -0.045 | 0.026 | -0.094 | 0.008  |
| 168 | Item 13--Item 16 | -0.002 | 0.026 | -0.053 | 0.049  |
| 169 | Item 14--Item 16 | 0.045  | 0.027 | -0.006 | 0.097  |
| 170 | Item 3--Item 16  | 0.109  | 0.026 | 0.059  | 0.159  |
| 171 | Item 4--Item 16  | 0.216  | 0.025 | 0.167  | 0.266  |
| 172 | Item 2--Item 19  | -0.099 | 0.027 | -0.15  | -0.046 |
| 173 | Item 7--Item 19  | 0.103  | 0.026 | 0.051  | 0.155  |
| 174 | Item 9--Item 19  | 0.013  | 0.027 | -0.04  | 0.066  |

|     |                  |        |       |        |        |
|-----|------------------|--------|-------|--------|--------|
| 175 | Item 17--Item 19 | 0.131  | 0.026 | 0.079  | 0.182  |
| 176 | Item 6--Item 19  | -0.027 | 0.027 | -0.08  | 0.025  |
| 177 | Item 8--Item 19  | -0.062 | 0.027 | -0.115 | -0.011 |
| 178 | Item 11--Item 19 | -0.016 | 0.026 | -0.068 | 0.036  |
| 179 | Item 18--Item 19 | 0.057  | 0.027 | 0.005  | 0.11   |
| 180 | Item 1--Item 19  | -0.01  | 0.027 | -0.063 | 0.044  |
| 181 | Item 10--Item 19 | -0.038 | 0.027 | -0.09  | 0.012  |
| 182 | Item 15--Item 19 | 0.037  | 0.027 | -0.014 | 0.09   |
| 183 | Item 20--Item 19 | 0.126  | 0.026 | 0.072  | 0.177  |
| 184 | Item 5--Item 19  | -0.004 | 0.026 | -0.057 | 0.049  |
| 185 | Item 12--Item 19 | -0.035 | 0.027 | -0.087 | 0.018  |
| 186 | Item 13--Item 19 | -0.037 | 0.026 | -0.089 | 0.015  |
| 187 | Item 14--Item 19 | -0.047 | 0.027 | -0.098 | 0.004  |
| 188 | Item 3--Item 19  | 0.209  | 0.026 | 0.158  | 0.258  |
| 189 | Item 4--Item 19  | 0.198  | 0.026 | 0.147  | 0.248  |
| 190 | Item 16--Item 19 | 0.13   | 0.026 | 0.077  | 0.181  |

---

Note: *Post.mean* refers to posterior mean, *Post.sd* refers to posterior standard deviation, *Cred.lb* refers to the lower bound of 95% credible interval, *Cred.ub* refers to the upper bound of 95% credible interval.

Table S9. Coefficients of each edge in the network model of girls (n = 1205).

|    | Relation         | <i>Post.mean</i> | <i>Post.sd</i> | <i>Cred.lb</i> | <i>Cred.ub</i> |
|----|------------------|------------------|----------------|----------------|----------------|
| 1  | Item 2--Item 7   | 0.246            | 0.027          | 0.194          | 0.299          |
| 2  | Item 2--Item 9   | 0.43             | 0.024          | 0.383          | 0.476          |
| 3  | Item 7--Item 9   | 0.107            | 0.029          | 0.05           | 0.163          |
| 4  | Item 2--Item 17  | 0.116            | 0.029          | 0.06           | 0.171          |
| 5  | Item 7--Item 17  | 0.04             | 0.029          | -0.017         | 0.1            |
| 6  | Item 9--Item 17  | 0.144            | 0.029          | 0.087          | 0.199          |
| 7  | Item 2--Item 6   | -0.071           | 0.029          | -0.128         | -0.014         |
| 8  | Item 7--Item 6   | -0.021           | 0.029          | -0.077         | 0.034          |
| 9  | Item 9--Item 6   | 0.095            | 0.029          | 0.037          | 0.151          |
| 10 | Item 17--Item 6  | 0.027            | 0.029          | -0.03          | 0.084          |
| 11 | Item 2--Item 8   | 0.02             | 0.029          | -0.036         | 0.076          |
| 12 | Item 7--Item 8   | 0.034            | 0.029          | -0.021         | 0.09           |
| 13 | Item 9--Item 8   | -0.003           | 0.029          | -0.059         | 0.054          |
| 14 | Item 17--Item 8  | -0.054           | 0.029          | -0.111         | 0.004          |
| 15 | Item 6--Item 8   | 0.105            | 0.029          | 0.047          | 0.162          |
| 16 | Item 2--Item 11  | -0.017           | 0.029          | -0.075         | 0.038          |
| 17 | Item 7--Item 11  | 0                | 0.029          | -0.057         | 0.057          |
| 18 | Item 9--Item 11  | 0.103            | 0.029          | 0.045          | 0.16           |
| 19 | Item 17--Item 11 | 0.01             | 0.029          | -0.048         | 0.068          |
| 20 | Item 6--Item 11  | 0.228            | 0.028          | 0.173          | 0.281          |
| 21 | Item 8--Item 11  | 0.057            | 0.029          | -0.001         | 0.114          |
| 22 | Item 2--Item 18  | 0.031            | 0.029          | -0.025         | 0.087          |
| 23 | Item 7--Item 18  | -0.045           | 0.029          | -0.101         | 0.011          |
| 24 | Item 9--Item 18  | -0.037           | 0.029          | -0.093         | 0.02           |
| 25 | Item 17--Item 18 | 0.008            | 0.029          | -0.049         | 0.063          |
| 26 | Item 6--Item 18  | 0.504            | 0.022          | 0.461          | 0.545          |
| 27 | Item 8--Item 18  | 0.061            | 0.029          | 0.005          | 0.117          |
| 28 | Item 11--Item 18 | 0.295            | 0.026          | 0.242          | 0.347          |
| 29 | Item 2--Item 1   | 0.258            | 0.027          | 0.204          | 0.31           |
| 30 | Item 7--Item 1   | 0.077            | 0.029          | 0.02           | 0.132          |
| 31 | Item 9--Item 1   | -0.041           | 0.029          | -0.098         | 0.015          |
| 32 | Item 17--Item 1  | 0.182            | 0.028          | 0.126          | 0.237          |
| 33 | Item 6--Item 1   | -0.085           | 0.029          | -0.139         | -0.03          |
| 34 | Item 8--Item 1   | 0.003            | 0.029          | -0.054         | 0.06           |
| 35 | Item 11--Item 1  | -0.041           | 0.029          | -0.097         | 0.017          |
| 36 | Item 18--Item 1  | 0.032            | 0.029          | -0.026         | 0.088          |
| 37 | Item 2--Item 10  | -0.033           | 0.029          | -0.09          | 0.022          |
| 38 | Item 7--Item 10  | 0.018            | 0.029          | -0.039         | 0.074          |
| 39 | Item 9--Item 10  | 0.131            | 0.028          | 0.075          | 0.186          |
| 40 | Item 17--Item 10 | -0.029           | 0.029          | -0.084         | 0.028          |
| 41 | Item 6--Item 10  | -0.077           | 0.029          | -0.131         | -0.02          |
| 42 | Item 8--Item 10  | 0.159            | 0.029          | 0.102          | 0.214          |

|    |                  |        |       |        |        |
|----|------------------|--------|-------|--------|--------|
| 43 | Item 11--Item 10 | 0.002  | 0.029 | -0.054 | 0.06   |
| 44 | Item 18--Item 10 | 0.021  | 0.029 | -0.036 | 0.079  |
| 45 | Item 1--Item 10  | 0.073  | 0.029 | 0.017  | 0.131  |
| 46 | Item 2--Item 15  | 0.038  | 0.028 | -0.016 | 0.094  |
| 47 | Item 7--Item 15  | 0.04   | 0.029 | -0.017 | 0.097  |
| 48 | Item 9--Item 15  | -0.09  | 0.029 | -0.147 | -0.034 |
| 49 | Item 17--Item 15 | 0.069  | 0.029 | 0.012  | 0.126  |
| 50 | Item 6--Item 15  | 0.01   | 0.029 | -0.048 | 0.065  |
| 51 | Item 8--Item 15  | 0.037  | 0.03  | -0.022 | 0.098  |
| 52 | Item 11--Item 15 | 0.078  | 0.029 | 0.022  | 0.135  |
| 53 | Item 18--Item 15 | -0.003 | 0.029 | -0.06  | 0.054  |
| 54 | Item 1--Item 15  | 0.043  | 0.029 | -0.014 | 0.1    |
| 55 | Item 10--Item 15 | 0.331  | 0.026 | 0.28   | 0.38   |
| 56 | Item 2--Item 20  | -0.054 | 0.029 | -0.112 | 0.001  |
| 57 | Item 7--Item 20  | 0.03   | 0.029 | -0.026 | 0.088  |
| 58 | Item 9--Item 20  | -0.023 | 0.029 | -0.078 | 0.032  |
| 59 | Item 17--Item 20 | 0.045  | 0.029 | -0.011 | 0.102  |
| 60 | Item 6--Item 20  | 0.095  | 0.029 | 0.039  | 0.15   |
| 61 | Item 8--Item 20  | -0.04  | 0.029 | -0.095 | 0.017  |
| 62 | Item 11--Item 20 | -0.042 | 0.029 | -0.098 | 0.013  |
| 63 | Item 18--Item 20 | 0.035  | 0.029 | -0.022 | 0.091  |
| 64 | Item 1--Item 20  | 0.196  | 0.028 | 0.141  | 0.251  |
| 65 | Item 10--Item 20 | 0.093  | 0.029 | 0.036  | 0.148  |
| 66 | Item 15--Item 20 | 0.173  | 0.028 | 0.117  | 0.229  |
| 67 | Item 2--Item 5   | -0.047 | 0.029 | -0.104 | 0.009  |
| 68 | Item 7--Item 5   | 0.039  | 0.029 | -0.017 | 0.096  |
| 69 | Item 9--Item 5   | -0.022 | 0.03  | -0.082 | 0.035  |
| 70 | Item 17--Item 5  | -0.045 | 0.029 | -0.101 | 0.012  |
| 71 | Item 6--Item 5   | -0.002 | 0.029 | -0.059 | 0.055  |
| 72 | Item 8--Item 5   | 0.14   | 0.028 | 0.084  | 0.196  |
| 73 | Item 11--Item 5  | -0.007 | 0.029 | -0.064 | 0.049  |
| 74 | Item 18--Item 5  | 0.073  | 0.029 | 0.016  | 0.129  |
| 75 | Item 1--Item 5   | -0.021 | 0.029 | -0.077 | 0.036  |
| 76 | Item 10--Item 5  | 0.034  | 0.029 | -0.022 | 0.091  |
| 77 | Item 15--Item 5  | 0.048  | 0.03  | -0.01  | 0.107  |
| 78 | Item 20--Item 5  | -0.022 | 0.029 | -0.08  | 0.034  |
| 79 | Item 2--Item 12  | 0.054  | 0.029 | -0.001 | 0.111  |
| 80 | Item 7--Item 12  | 0.01   | 0.029 | -0.047 | 0.067  |
| 81 | Item 9--Item 12  | -0.004 | 0.029 | -0.061 | 0.052  |
| 82 | Item 17--Item 12 | -0.047 | 0.029 | -0.102 | 0.007  |
| 83 | Item 6--Item 12  | -0.049 | 0.029 | -0.104 | 0.007  |
| 84 | Item 8--Item 12  | 0.038  | 0.028 | -0.018 | 0.093  |
| 85 | Item 11--Item 12 | 0.161  | 0.028 | 0.105  | 0.215  |
| 86 | Item 18--Item 12 | 0.054  | 0.029 | -0.005 | 0.111  |

|     |                  |        |       |        |        |
|-----|------------------|--------|-------|--------|--------|
| 87  | Item 1--Item 12  | 0.048  | 0.029 | -0.01  | 0.105  |
| 88  | Item 10--Item 12 | 0.056  | 0.029 | -0.001 | 0.113  |
| 89  | Item 15--Item 12 | -0.053 | 0.03  | -0.109 | 0.006  |
| 90  | Item 20--Item 12 | 0.067  | 0.029 | 0.009  | 0.123  |
| 91  | Item 5--Item 12  | 0.091  | 0.029 | 0.034  | 0.147  |
| 92  | Item 2--Item 13  | -0.086 | 0.029 | -0.141 | -0.029 |
| 93  | Item 7--Item 13  | 0.024  | 0.029 | -0.033 | 0.082  |
| 94  | Item 9--Item 13  | 0.019  | 0.029 | -0.038 | 0.074  |
| 95  | Item 17--Item 13 | 0.053  | 0.029 | -0.004 | 0.11   |
| 96  | Item 6--Item 13  | 0.115  | 0.029 | 0.059  | 0.171  |
| 97  | Item 8--Item 13  | 0.095  | 0.029 | 0.039  | 0.149  |
| 98  | Item 11--Item 13 | 0.134  | 0.028 | 0.078  | 0.188  |
| 99  | Item 18--Item 13 | 0.028  | 0.029 | -0.028 | 0.085  |
| 100 | Item 1--Item 13  | 0.007  | 0.029 | -0.049 | 0.062  |
| 101 | Item 10--Item 13 | 0.107  | 0.029 | 0.05   | 0.163  |
| 102 | Item 15--Item 13 | -0.081 | 0.029 | -0.136 | -0.023 |
| 103 | Item 20--Item 13 | 0.055  | 0.029 | -0.002 | 0.111  |
| 104 | Item 5--Item 13  | 0.078  | 0.029 | 0.021  | 0.135  |
| 105 | Item 12--Item 13 | 0.243  | 0.027 | 0.19   | 0.295  |
| 106 | Item 2--Item 14  | 0.031  | 0.029 | -0.024 | 0.089  |
| 107 | Item 7--Item 14  | -0.086 | 0.029 | -0.143 | -0.031 |
| 108 | Item 9--Item 14  | -0.004 | 0.028 | -0.06  | 0.052  |
| 109 | Item 17--Item 14 | -0.01  | 0.029 | -0.067 | 0.048  |
| 110 | Item 6--Item 14  | 0.055  | 0.029 | -0.001 | 0.113  |
| 111 | Item 8--Item 14  | -0.007 | 0.029 | -0.065 | 0.051  |
| 112 | Item 11--Item 14 | -0.057 | 0.029 | -0.112 | -0.001 |
| 113 | Item 18--Item 14 | -0.053 | 0.028 | -0.109 | 0.002  |
| 114 | Item 1--Item 14  | 0.064  | 0.029 | 0.007  | 0.121  |
| 115 | Item 10--Item 14 | -0.045 | 0.029 | -0.102 | 0.013  |
| 116 | Item 15--Item 14 | 0.057  | 0.029 | 0.001  | 0.112  |
| 117 | Item 20--Item 14 | 0.031  | 0.029 | -0.026 | 0.088  |
| 118 | Item 5--Item 14  | 0.306  | 0.027 | 0.253  | 0.356  |
| 119 | Item 12--Item 14 | 0.075  | 0.029 | 0.018  | 0.131  |
| 120 | Item 13--Item 14 | 0.169  | 0.028 | 0.114  | 0.223  |
| 121 | Item 2--Item 3   | 0.237  | 0.027 | 0.183  | 0.29   |
| 122 | Item 7--Item 3   | -0.029 | 0.029 | -0.086 | 0.027  |
| 123 | Item 9--Item 3   | -0.037 | 0.029 | -0.094 | 0.02   |
| 124 | Item 17--Item 3  | 0.041  | 0.03  | -0.017 | 0.099  |
| 125 | Item 6--Item 3   | -0.031 | 0.029 | -0.088 | 0.024  |
| 126 | Item 8--Item 3   | -0.04  | 0.029 | -0.096 | 0.019  |
| 127 | Item 11--Item 3  | 0.034  | 0.029 | -0.023 | 0.092  |
| 128 | Item 18--Item 3  | 0.024  | 0.029 | -0.032 | 0.081  |
| 129 | Item 1--Item 3   | 0.06   | 0.029 | 0.001  | 0.116  |
| 130 | Item 10--Item 3  | 0.03   | 0.029 | -0.027 | 0.087  |

|     |                  |        |       |        |        |
|-----|------------------|--------|-------|--------|--------|
| 131 | Item 15--Item 3  | 0.02   | 0.029 | -0.038 | 0.076  |
| 132 | Item 20--Item 3  | 0.079  | 0.029 | 0.021  | 0.135  |
| 133 | Item 5--Item 3   | 0.019  | 0.029 | -0.037 | 0.076  |
| 134 | Item 12--Item 3  | -0.128 | 0.029 | -0.183 | -0.071 |
| 135 | Item 13--Item 3  | -0.049 | 0.029 | -0.106 | 0.009  |
| 136 | Item 14--Item 3  | -0.067 | 0.029 | -0.125 | -0.01  |
| 137 | Item 2--Item 4   | -0.025 | 0.029 | -0.082 | 0.03   |
| 138 | Item 7--Item 4   | 0.025  | 0.029 | -0.032 | 0.081  |
| 139 | Item 9--Item 4   | 0.001  | 0.03  | -0.058 | 0.059  |
| 140 | Item 17--Item 4  | 0.038  | 0.029 | -0.02  | 0.095  |
| 141 | Item 6--Item 4   | 0.026  | 0.029 | -0.032 | 0.082  |
| 142 | Item 8--Item 4   | -0.011 | 0.029 | -0.068 | 0.046  |
| 143 | Item 11--Item 4  | 0.012  | 0.029 | -0.044 | 0.069  |
| 144 | Item 18--Item 4  | -0.101 | 0.028 | -0.155 | -0.045 |
| 145 | Item 1--Item 4   | 0.012  | 0.029 | -0.044 | 0.067  |
| 146 | Item 10--Item 4  | -0.107 | 0.029 | -0.163 | -0.051 |
| 147 | Item 15--Item 4  | 0.047  | 0.029 | -0.012 | 0.104  |
| 148 | Item 20--Item 4  | -0.024 | 0.029 | -0.083 | 0.032  |
| 149 | Item 5--Item 4   | -0.032 | 0.029 | -0.088 | 0.025  |
| 150 | Item 12--Item 4  | -0.049 | 0.029 | -0.107 | 0.007  |
| 151 | Item 13--Item 4  | 0.047  | 0.029 | -0.009 | 0.104  |
| 152 | Item 14--Item 4  | 0.038  | 0.029 | -0.019 | 0.094  |
| 153 | Item 3--Item 4   | 0.233  | 0.028 | 0.178  | 0.287  |
| 154 | Item 2--Item 16  | -0.081 | 0.029 | -0.136 | -0.025 |
| 155 | Item 7--Item 16  | -0.011 | 0.029 | -0.067 | 0.046  |
| 156 | Item 9--Item 16  | 0.002  | 0.029 | -0.054 | 0.058  |
| 157 | Item 17--Item 16 | 0.039  | 0.029 | -0.02  | 0.094  |
| 158 | Item 6--Item 16  | -0.052 | 0.029 | -0.108 | 0.003  |
| 159 | Item 8--Item 16  | -0.077 | 0.029 | -0.132 | -0.021 |
| 160 | Item 11--Item 16 | -0.003 | 0.029 | -0.059 | 0.053  |
| 161 | Item 18--Item 16 | 0.028  | 0.029 | -0.029 | 0.085  |
| 162 | Item 1--Item 16  | -0.001 | 0.029 | -0.058 | 0.054  |
| 163 | Item 10--Item 16 | 0.091  | 0.029 | 0.035  | 0.148  |
| 164 | Item 15--Item 16 | 0.011  | 0.029 | -0.046 | 0.067  |
| 165 | Item 20--Item 16 | -0.006 | 0.029 | -0.063 | 0.05   |
| 166 | Item 5--Item 16  | 0.058  | 0.029 | 0.002  | 0.114  |
| 167 | Item 12--Item 16 | -0.051 | 0.028 | -0.106 | 0.006  |
| 168 | Item 13--Item 16 | -0.042 | 0.028 | -0.096 | 0.014  |
| 169 | Item 14--Item 16 | -0.087 | 0.029 | -0.144 | -0.032 |
| 170 | Item 3--Item 16  | 0.079  | 0.029 | 0.023  | 0.134  |
| 171 | Item 4--Item 16  | 0.264  | 0.027 | 0.212  | 0.316  |
| 172 | Item 2--Item 19  | -0.028 | 0.029 | -0.084 | 0.03   |
| 173 | Item 7--Item 19  | 0.132  | 0.028 | 0.078  | 0.188  |
| 174 | Item 9--Item 19  | 0.022  | 0.029 | -0.034 | 0.079  |

|     |                  |        |       |        |        |
|-----|------------------|--------|-------|--------|--------|
| 175 | Item 17--Item 19 | 0.209  | 0.028 | 0.154  | 0.263  |
| 176 | Item 6--Item 19  | -0.002 | 0.029 | -0.059 | 0.055  |
| 177 | Item 8--Item 19  | 0.05   | 0.029 | -0.006 | 0.107  |
| 178 | Item 11--Item 19 | -0.097 | 0.029 | -0.152 | -0.041 |
| 179 | Item 18--Item 19 | 0.044  | 0.029 | -0.011 | 0.101  |
| 180 | Item 1--Item 19  | -0.05  | 0.029 | -0.105 | 0.009  |
| 181 | Item 10--Item 19 | 0.036  | 0.029 | -0.02  | 0.092  |
| 182 | Item 15--Item 19 | -0.004 | 0.029 | -0.06  | 0.053  |
| 183 | Item 20--Item 19 | 0.011  | 0.029 | -0.048 | 0.068  |
| 184 | Item 5--Item 19  | -0.14  | 0.028 | -0.195 | -0.084 |
| 185 | Item 12--Item 19 | -0.001 | 0.029 | -0.059 | 0.055  |
| 186 | Item 13--Item 19 | -0.028 | 0.029 | -0.083 | 0.028  |
| 187 | Item 14--Item 19 | -0.002 | 0.029 | -0.06  | 0.054  |
| 188 | Item 3--Item 19  | 0.249  | 0.027 | 0.193  | 0.301  |
| 189 | Item 4--Item 19  | 0.083  | 0.029 | 0.026  | 0.141  |
| 190 | Item 16--Item 19 | 0.216  | 0.028 | 0.161  | 0.271  |

---

Note: *Post.mean* refers to posterior mean, *Post.sd* refers to posterior standard deviation, *Cred.lb* refers to the lower bound of 95% credible interval, *Cred.ub* refers to the upper bound of 95% credible interval.

Table S10. Coefficients of each edge's difference between the network structure of C-ZTPI-20 items among boys and the network structure of C-ZTPI-20 items among girls (Ref. network structure of C-ZTPI-20 items among girls)

|    | Relation         | <i>Post.mean</i> | <i>Post.sd</i> | <i>Cred.lb</i> | <i>Cred.ub</i> |
|----|------------------|------------------|----------------|----------------|----------------|
| 1  | Item 2--Item 7   | 0.003            | 0.037          | -0.07          | 0.075          |
| 2  | Item 2--Item 9   | -0.079           | 0.033          | -0.143         | -0.014         |
| 3  | Item 7--Item 9   | 0.057            | 0.038          | -0.017         | 0.132          |
| 4  | Item 2--Item 17  | -0.073           | 0.039          | -0.149         | 0.004          |
| 5  | Item 7--Item 17  | 0.027            | 0.039          | -0.049         | 0.104          |
| 6  | Item 9--Item 17  | -0.072           | 0.039          | -0.15          | 0.005          |
| 7  | Item 2--Item 6   | 0.053            | 0.04           | -0.026         | 0.127          |
| 8  | Item 7--Item 6   | 0.052            | 0.04           | -0.028         | 0.131          |
| 9  | Item 9--Item 6   | -0.098           | 0.039          | -0.175         | -0.021         |
| 10 | Item 17--Item 6  | -0.043           | 0.039          | -0.121         | 0.035          |
| 11 | Item 2--Item 8   | -0.034           | 0.039          | -0.111         | 0.043          |
| 12 | Item 7--Item 8   | -0.014           | 0.04           | -0.093         | 0.066          |
| 13 | Item 9--Item 8   | 0.003            | 0.039          | -0.075         | 0.078          |
| 14 | Item 17--Item 8  | 0.088            | 0.039          | 0.011          | 0.163          |
| 15 | Item 6--Item 8   | -0.001           | 0.039          | -0.078         | 0.075          |
| 16 | Item 2--Item 11  | 0.015            | 0.039          | -0.064         | 0.092          |
| 17 | Item 7--Item 11  | 0.005            | 0.04           | -0.073         | 0.082          |
| 18 | Item 9--Item 11  | -0.074           | 0.039          | -0.15          | 0.003          |
| 19 | Item 17--Item 11 | -0.04            | 0.039          | -0.115         | 0.038          |
| 20 | Item 6--Item 11  | -0.028           | 0.037          | -0.1           | 0.046          |
| 21 | Item 8--Item 11  | -0.013           | 0.039          | -0.089         | 0.064          |
| 22 | Item 2--Item 18  | -0.013           | 0.04           | -0.09          | 0.066          |
| 23 | Item 7--Item 18  | -0.022           | 0.04           | -0.098         | 0.057          |
| 24 | Item 9--Item 18  | 0.084            | 0.039          | 0.009          | 0.161          |
| 25 | Item 17--Item 18 | -0.044           | 0.039          | -0.122         | 0.033          |
| 26 | Item 6--Item 18  | -0.098           | 0.031          | -0.16          | -0.038         |
| 27 | Item 8--Item 18  | 0.057            | 0.039          | -0.019         | 0.136          |
| 28 | Item 11--Item 18 | 0.001            | 0.036          | -0.07          | 0.072          |
| 29 | Item 2--Item 1   | 0.033            | 0.036          | -0.038         | 0.104          |
| 30 | Item 7--Item 1   | -0.05            | 0.039          | -0.125         | 0.026          |
| 31 | Item 9--Item 1   | 0.035            | 0.039          | -0.043         | 0.114          |
| 32 | Item 17--Item 1  | -0.037           | 0.038          | -0.113         | 0.038          |
| 33 | Item 6--Item 1   | 0.065            | 0.039          | -0.01          | 0.141          |
| 34 | Item 8--Item 1   | -0.024           | 0.04           | -0.102         | 0.054          |
| 35 | Item 11--Item 1  | 0.072            | 0.039          | -0.005         | 0.15           |
| 36 | Item 18--Item 1  | -0.073           | 0.04           | -0.149         | 0.006          |
| 37 | Item 2--Item 10  | -0.027           | 0.039          | -0.106         | 0.049          |
| 38 | Item 7--Item 10  | 0.037            | 0.039          | -0.04          | 0.115          |
| 39 | Item 9--Item 10  | -0.012           | 0.038          | -0.085         | 0.063          |
| 40 | Item 17--Item 10 | 0.067            | 0.039          | -0.01          | 0.145          |

|    |                  |        |       |        |        |
|----|------------------|--------|-------|--------|--------|
| 41 | Item 6--Item 10  | 0.04   | 0.039 | -0.036 | 0.115  |
| 42 | Item 8--Item 10  | -0.084 | 0.039 | -0.158 | -0.007 |
| 43 | Item 11--Item 10 | 0.039  | 0.039 | -0.037 | 0.116  |
| 44 | Item 18--Item 10 | 0.006  | 0.04  | -0.071 | 0.083  |
| 45 | Item 1--Item 10  | -0.019 | 0.04  | -0.097 | 0.058  |
| 46 | Item 2--Item 15  | 0.006  | 0.04  | -0.072 | 0.084  |
| 47 | Item 7--Item 15  | -0.067 | 0.039 | -0.143 | 0.009  |
| 48 | Item 9--Item 15  | 0.078  | 0.04  | 0      | 0.156  |
| 49 | Item 17--Item 15 | 0.016  | 0.039 | -0.06  | 0.093  |
| 50 | Item 6--Item 15  | -0.001 | 0.039 | -0.077 | 0.075  |
| 51 | Item 8--Item 15  | 0.027  | 0.039 | -0.049 | 0.103  |
| 52 | Item 11--Item 15 | -0.063 | 0.04  | -0.14  | 0.013  |
| 53 | Item 18--Item 15 | 0.003  | 0.039 | -0.075 | 0.082  |
| 54 | Item 1--Item 15  | -0.009 | 0.039 | -0.084 | 0.067  |
| 55 | Item 10--Item 15 | -0.002 | 0.035 | -0.069 | 0.065  |
| 56 | Item 2--Item 20  | 0.129  | 0.039 | 0.052  | 0.206  |
| 57 | Item 7--Item 20  | 0.07   | 0.04  | -0.008 | 0.147  |
| 58 | Item 9--Item 20  | -0.062 | 0.039 | -0.136 | 0.014  |
| 59 | Item 17--Item 20 | -0.01  | 0.039 | -0.086 | 0.066  |
| 60 | Item 6--Item 20  | -0.061 | 0.039 | -0.137 | 0.014  |
| 61 | Item 8--Item 20  | 0.079  | 0.039 | 0.003  | 0.154  |
| 62 | Item 11--Item 20 | 0.034  | 0.039 | -0.041 | 0.111  |
| 63 | Item 18--Item 20 | 0.024  | 0.039 | -0.051 | 0.099  |
| 64 | Item 1--Item 20  | -0.072 | 0.038 | -0.146 | 0.006  |
| 65 | Item 10--Item 20 | -0.131 | 0.039 | -0.211 | -0.054 |
| 66 | Item 15--Item 20 | 0.009  | 0.038 | -0.067 | 0.084  |
| 67 | Item 2--Item 5   | 0.076  | 0.039 | -0.002 | 0.152  |
| 68 | Item 7--Item 5   | -0.037 | 0.039 | -0.113 | 0.04   |
| 69 | Item 9--Item 5   | -0.014 | 0.039 | -0.091 | 0.063  |
| 70 | Item 17--Item 5  | 0.05   | 0.04  | -0.03  | 0.127  |
| 71 | Item 6--Item 5   | 0.028  | 0.039 | -0.047 | 0.103  |
| 72 | Item 8--Item 5   | -0.073 | 0.039 | -0.148 | 0.005  |
| 73 | Item 11--Item 5  | 0.081  | 0.039 | 0.005  | 0.156  |
| 74 | Item 18--Item 5  | -0.16  | 0.039 | -0.235 | -0.084 |
| 75 | Item 1--Item 5   | -0.029 | 0.039 | -0.106 | 0.048  |
| 76 | Item 10--Item 5  | 0.016  | 0.04  | -0.063 | 0.093  |
| 77 | Item 15--Item 5  | -0.023 | 0.04  | -0.103 | 0.053  |
| 78 | Item 20--Item 5  | 0.018  | 0.039 | -0.06  | 0.093  |
| 79 | Item 2--Item 12  | -0.076 | 0.039 | -0.152 | 0      |
| 80 | Item 7--Item 12  | -0.002 | 0.039 | -0.079 | 0.075  |
| 81 | Item 9--Item 12  | 0.043  | 0.039 | -0.035 | 0.12   |
| 82 | Item 17--Item 12 | 0.033  | 0.039 | -0.045 | 0.11   |
| 83 | Item 6--Item 12  | 0.035  | 0.039 | -0.041 | 0.114  |
| 84 | Item 8--Item 12  | -0.024 | 0.04  | -0.101 | 0.055  |

|     |                  |        |       |        |        |
|-----|------------------|--------|-------|--------|--------|
| 85  | Item 11--Item 12 | -0.036 | 0.038 | -0.112 | 0.038  |
| 86  | Item 18--Item 12 | -0.036 | 0.039 | -0.111 | 0.041  |
| 87  | Item 1--Item 12  | 0.044  | 0.039 | -0.032 | 0.122  |
| 88  | Item 10--Item 12 | 0.014  | 0.039 | -0.063 | 0.089  |
| 89  | Item 15--Item 12 | -0.009 | 0.039 | -0.084 | 0.067  |
| 90  | Item 20--Item 12 | -0.018 | 0.039 | -0.093 | 0.058  |
| 91  | Item 5--Item 12  | 0.005  | 0.039 | -0.072 | 0.082  |
| 92  | Item 2--Item 13  | 0.071  | 0.039 | -0.006 | 0.149  |
| 93  | Item 7--Item 13  | -0.095 | 0.039 | -0.175 | -0.018 |
| 94  | Item 9--Item 13  | -0.026 | 0.039 | -0.101 | 0.051  |
| 95  | Item 17--Item 13 | 0.006  | 0.04  | -0.072 | 0.084  |
| 96  | Item 6--Item 13  | -0.04  | 0.04  | -0.119 | 0.037  |
| 97  | Item 8--Item 13  | 0.014  | 0.039 | -0.063 | 0.091  |
| 98  | Item 11--Item 13 | -0.085 | 0.039 | -0.16  | -0.008 |
| 99  | Item 18--Item 13 | 0.08   | 0.039 | 0.004  | 0.157  |
| 100 | Item 1--Item 13  | -0.007 | 0.04  | -0.087 | 0.072  |
| 101 | Item 10--Item 13 | -0.091 | 0.039 | -0.168 | -0.016 |
| 102 | Item 15--Item 13 | 0.105  | 0.04  | 0.026  | 0.182  |
| 103 | Item 20--Item 13 | -0.1   | 0.039 | -0.175 | -0.022 |
| 104 | Item 5--Item 13  | -0.002 | 0.039 | -0.077 | 0.075  |
| 105 | Item 12--Item 13 | 0.076  | 0.036 | 0.005  | 0.146  |
| 106 | Item 2--Item 14  | -0.051 | 0.039 | -0.127 | 0.025  |
| 107 | Item 7--Item 14  | 0.018  | 0.039 | -0.058 | 0.093  |
| 108 | Item 9--Item 14  | 0.033  | 0.039 | -0.044 | 0.109  |
| 109 | Item 17--Item 14 | -0.013 | 0.04  | -0.092 | 0.065  |
| 110 | Item 6--Item 14  | -0.03  | 0.039 | -0.106 | 0.049  |
| 111 | Item 8--Item 14  | -0.001 | 0.039 | -0.077 | 0.077  |
| 112 | Item 11--Item 14 | 0.038  | 0.039 | -0.037 | 0.114  |
| 113 | Item 18--Item 14 | 0.088  | 0.039 | 0.009  | 0.163  |
| 114 | Item 1--Item 14  | -0.101 | 0.039 | -0.179 | -0.026 |
| 115 | Item 10--Item 14 | 0.037  | 0.04  | -0.04  | 0.114  |
| 116 | Item 15--Item 14 | 0.085  | 0.039 | 0.005  | 0.164  |
| 117 | Item 20--Item 14 | 0.01   | 0.04  | -0.065 | 0.089  |
| 118 | Item 5--Item 14  | 0.023  | 0.035 | -0.046 | 0.09   |
| 119 | Item 12--Item 14 | 0.061  | 0.04  | -0.017 | 0.139  |
| 120 | Item 13--Item 14 | -0.014 | 0.038 | -0.09  | 0.06   |
| 121 | Item 2--Item 3   | -0.094 | 0.038 | -0.169 | -0.019 |
| 122 | Item 7--Item 3   | 0.068  | 0.039 | -0.01  | 0.145  |
| 123 | Item 9--Item 3   | 0.046  | 0.04  | -0.033 | 0.124  |
| 124 | Item 17--Item 3  | -0.026 | 0.039 | -0.102 | 0.052  |
| 125 | Item 6--Item 3   | 0.057  | 0.04  | -0.022 | 0.135  |
| 126 | Item 8--Item 3   | 0.056  | 0.039 | -0.022 | 0.133  |
| 127 | Item 11--Item 3  | 0.046  | 0.039 | -0.029 | 0.12   |
| 128 | Item 18--Item 3  | -0.093 | 0.04  | -0.171 | -0.016 |

|     |                  |        |       |        |        |
|-----|------------------|--------|-------|--------|--------|
| 129 | Item 1--Item 3   | 0.027  | 0.039 | -0.047 | 0.105  |
| 130 | Item 10--Item 3  | 0.058  | 0.039 | -0.018 | 0.136  |
| 131 | Item 15--Item 3  | 0.045  | 0.039 | -0.029 | 0.12   |
| 132 | Item 20--Item 3  | -0.065 | 0.04  | -0.14  | 0.015  |
| 133 | Item 5--Item 3   | -0.066 | 0.04  | -0.144 | 0.012  |
| 134 | Item 12--Item 3  | -0.001 | 0.039 | -0.077 | 0.073  |
| 135 | Item 13--Item 3  | 0.077  | 0.039 | 0.001  | 0.156  |
| 136 | Item 14--Item 3  | 0.021  | 0.04  | -0.056 | 0.098  |
| 137 | Item 2--Item 4   | 0.023  | 0.04  | -0.054 | 0.101  |
| 138 | Item 7--Item 4   | -0.015 | 0.039 | -0.09  | 0.065  |
| 139 | Item 9--Item 4   | 0.057  | 0.039 | -0.022 | 0.134  |
| 140 | Item 17--Item 4  | -0.033 | 0.039 | -0.109 | 0.042  |
| 141 | Item 6--Item 4   | -0.044 | 0.039 | -0.119 | 0.033  |
| 142 | Item 8--Item 4   | -0.041 | 0.04  | -0.118 | 0.036  |
| 143 | Item 11--Item 4  | -0.007 | 0.039 | -0.084 | 0.069  |
| 144 | Item 18--Item 4  | 0.068  | 0.039 | -0.009 | 0.146  |
| 145 | Item 1--Item 4   | 0.049  | 0.039 | -0.029 | 0.126  |
| 146 | Item 10--Item 4  | 0.134  | 0.039 | 0.057  | 0.208  |
| 147 | Item 15--Item 4  | -0.109 | 0.039 | -0.186 | -0.032 |
| 148 | Item 20--Item 4  | -0.007 | 0.039 | -0.084 | 0.069  |
| 149 | Item 5--Item 4   | 0.083  | 0.039 | 0.005  | 0.16   |
| 150 | Item 12--Item 4  | 0.03   | 0.039 | -0.045 | 0.107  |
| 151 | Item 13--Item 4  | -0.115 | 0.04  | -0.194 | -0.035 |
| 152 | Item 14--Item 4  | -0.042 | 0.04  | -0.117 | 0.036  |
| 153 | Item 3--Item 4   | 0.034  | 0.036 | -0.037 | 0.105  |
| 154 | Item 2--Item 16  | 0.124  | 0.04  | 0.047  | 0.203  |
| 155 | Item 7--Item 16  | -0.011 | 0.039 | -0.088 | 0.066  |
| 156 | Item 9--Item 16  | -0.014 | 0.04  | -0.092 | 0.061  |
| 157 | Item 17--Item 16 | 0.083  | 0.039 | 0.009  | 0.158  |
| 158 | Item 6--Item 16  | 0.038  | 0.04  | -0.039 | 0.116  |
| 159 | Item 8--Item 16  | 0.041  | 0.039 | -0.036 | 0.119  |
| 160 | Item 11--Item 16 | -0.008 | 0.039 | -0.084 | 0.069  |
| 161 | Item 18--Item 16 | -0.055 | 0.039 | -0.133 | 0.019  |
| 162 | Item 1--Item 16  | -0.046 | 0.039 | -0.122 | 0.031  |
| 163 | Item 10--Item 16 | -0.118 | 0.039 | -0.195 | -0.041 |
| 164 | Item 15--Item 16 | 0.056  | 0.039 | -0.02  | 0.131  |
| 165 | Item 20--Item 16 | 0.039  | 0.04  | -0.038 | 0.115  |
| 166 | Item 5--Item 16  | -0.114 | 0.04  | -0.192 | -0.034 |
| 167 | Item 12--Item 16 | 0.006  | 0.04  | -0.071 | 0.084  |
| 168 | Item 13--Item 16 | 0.039  | 0.039 | -0.038 | 0.115  |
| 169 | Item 14--Item 16 | 0.133  | 0.039 | 0.057  | 0.208  |
| 170 | Item 3--Item 16  | 0.031  | 0.039 | -0.044 | 0.107  |
| 171 | Item 4--Item 16  | -0.049 | 0.037 | -0.124 | 0.024  |
| 172 | Item 2--Item 19  | -0.071 | 0.039 | -0.146 | 0.008  |

|     |                  |        |       |        |        |
|-----|------------------|--------|-------|--------|--------|
| 173 | Item 7--Item 19  | -0.029 | 0.038 | -0.104 | 0.045  |
| 174 | Item 9--Item 19  | -0.009 | 0.039 | -0.086 | 0.068  |
| 175 | Item 17--Item 19 | -0.077 | 0.038 | -0.151 | -0.001 |
| 176 | Item 6--Item 19  | -0.025 | 0.04  | -0.101 | 0.053  |
| 177 | Item 8--Item 19  | -0.113 | 0.04  | -0.19  | -0.035 |
| 178 | Item 11--Item 19 | 0.081  | 0.039 | 0.001  | 0.156  |
| 179 | Item 18--Item 19 | 0.013  | 0.04  | -0.069 | 0.09   |
| 180 | Item 1--Item 19  | 0.039  | 0.04  | -0.038 | 0.118  |
| 181 | Item 10--Item 19 | -0.074 | 0.039 | -0.15  | 0.003  |
| 182 | Item 15--Item 19 | 0.042  | 0.039 | -0.035 | 0.119  |
| 183 | Item 20--Item 19 | 0.115  | 0.039 | 0.041  | 0.193  |
| 184 | Item 5--Item 19  | 0.136  | 0.039 | 0.059  | 0.213  |
| 185 | Item 12--Item 19 | -0.033 | 0.039 | -0.109 | 0.041  |
| 186 | Item 13--Item 19 | -0.009 | 0.039 | -0.086 | 0.065  |
| 187 | Item 14--Item 19 | -0.045 | 0.039 | -0.123 | 0.031  |
| 188 | Item 3--Item 19  | -0.041 | 0.037 | -0.114 | 0.031  |
| 189 | Item 4--Item 19  | 0.115  | 0.039 | 0.04   | 0.192  |
| 190 | Item 16--Item 19 | -0.087 | 0.039 | -0.161 | -0.011 |

Note: *Post.mean* refers to posterior mean, *Post.sd* refers to posterior standard deviation, *Cred.lb* refers to the lower bound of 95% credible interval, *Cred.ub* refers to the upper bound of 95% credible interval.

Table S11. Node strength in the network model of total sample (n = 2634).

| Node # in the network | Item Label in C-ZTPI-20 | <i>Post.mean</i> | <i>Post.sd</i> | <i>Cred.lb</i> | <i>Cred.ub</i> |
|-----------------------|-------------------------|------------------|----------------|----------------|----------------|
| 1                     | Item 2                  | 1.439            | 0.059          | 1.324          | 1.559          |
| 2                     | Item 7                  | 0.857            | 0.048          | 0.764          | 0.949          |
| 3                     | Item 9                  | 0.928            | 0.050          | 0.832          | 1.029          |
| 4                     | Item 17                 | 0.761            | 0.045          | 0.674          | 0.851          |
| 5                     | Item 6                  | 1.069            | 0.047          | 0.976          | 1.163          |
| 6                     | Item 8                  | 0.710            | 0.041          | 0.630          | 0.791          |
| 7                     | Item 11                 | 1.033            | 0.056          | 0.923          | 1.141          |
| 8                     | Item 18                 | 1.141            | 0.050          | 1.046          | 1.240          |
| 9                     | Item 1                  | 0.956            | 0.050          | 0.859          | 1.054          |
| 10                    | Item 10                 | 1.068            | 0.065          | 0.941          | 1.196          |
| 11                    | Item 15                 | 1.015            | 0.058          | 0.900          | 1.129          |
| 12                    | Item 20                 | 0.701            | 0.051          | 0.602          | 0.800          |
| 13                    | Item 5                  | 0.735            | 0.039          | 0.660          | 0.812          |
| 14                    | Item 12                 | 1.042            | 0.057          | 0.931          | 1.152          |
| 15                    | Item 13                 | 1.097            | 0.048          | 1.006          | 1.190          |
| 16                    | Item 14                 | 0.877            | 0.047          | 0.784          | 0.967          |
| 17                    | Item 3                  | 1.204            | 0.051          | 1.108          | 1.305          |
| 18                    | Item 4                  | 0.781            | 0.040          | 0.705          | 0.858          |
| 19                    | Item 16                 | 0.715            | 0.040          | 0.637          | 0.794          |
| 20                    | Item 19                 | 1.153            | 0.061          | 1.032          | 1.274          |

Note: *Post.mean* refers to posterior mean, *Post.sd* refers to posterior standard deviation, *Cred.lb* refers to the lower bound of 95% credible interval, *Cred.ub* refers to the upper bound of 95% credible interval.

Table S12. Node strength in the network model of boys (n = 1429).

| Node # in the network | Item Label in C-ZTPI-20 | <i>Post.mean</i> | <i>Post.sd</i> | <i>Cred.lb</i> | <i>Cred.ub</i> |
|-----------------------|-------------------------|------------------|----------------|----------------|----------------|
| 1                     | Item 2                  | 1.271            | 0.068          | 1.136          | 1.400          |
| 2                     | Item 7                  | 0.946            | 0.069          | 0.813          | 1.082          |
| 3                     | Item 9                  | 0.849            | 0.059          | 0.736          | 0.964          |
| 4                     | Item 17                 | 0.683            | 0.066          | 0.554          | 0.811          |
| 5                     | Item 6                  | 0.783            | 0.039          | 0.708          | 0.860          |
| 6                     | Item 8                  | 0.653            | 0.059          | 0.537          | 0.768          |
| 7                     | Item 11                 | 0.774            | 0.054          | 0.670          | 0.880          |
| 8                     | Item 18                 | 1.266            | 0.077          | 1.116          | 1.418          |
| 9                     | Item 1                  | 0.856            | 0.062          | 0.737          | 0.980          |
| 10                    | Item 10                 | 0.904            | 0.082          | 0.742          | 1.063          |
| 11                    | Item 15                 | 1.061            | 0.077          | 0.911          | 1.207          |
| 12                    | Item 20                 | 0.751            | 0.068          | 0.621          | 0.885          |
| 13                    | Item 5                  | 0.835            | 0.068          | 0.704          | 0.971          |
| 14                    | Item 12                 | 1.027            | 0.072          | 0.889          | 1.168          |
| 15                    | Item 13                 | 1.040            | 0.063          | 0.916          | 1.164          |
| 16                    | Item 14                 | 0.829            | 0.049          | 0.732          | 0.923          |
| 17                    | Item 3                  | 1.243            | 0.072          | 1.105          | 1.385          |
| 18                    | Item 4                  | 0.983            | 0.065          | 0.859          | 1.109          |
| 19                    | Item 16                 | 0.701            | 0.052          | 0.599          | 0.804          |
| 20                    | Item 19                 | 1.115            | 0.074          | 0.970          | 1.259          |

Note: *Post.mean* refers to posterior mean, *Post.sd* refers to posterior standard deviation, *Cred.lb* refers to the lower bound of 95% credible interval, *Cred.ub* refers to the upper bound of 95% credible interval.

Table S13. Node strength in the network model of girls (n = 1205).

| Node # in<br>the network | Item Label in C-<br>ZTPI-20 | <i>Post.mean</i> | <i>Post.sd</i> | <i>Cred.lb</i> | <i>Cred.ub</i> |
|--------------------------|-----------------------------|------------------|----------------|----------------|----------------|
| 1                        | Item 2                      | 1.525            | 0.069          | 1.388          | 1.660          |
| 2                        | Item 7                      | 0.649            | 0.056          | 0.539          | 0.757          |
| 3                        | Item 9                      | 1.100            | 0.075          | 0.958          | 1.245          |
| 4                        | Item 17                     | 0.720            | 0.054          | 0.615          | 0.827          |
| 5                        | Item 6                      | 1.375            | 0.081          | 1.216          | 1.535          |
| 6                        | Item 8                      | 0.637            | 0.059          | 0.522          | 0.755          |
| 7                        | Item 11                     | 1.153            | 0.072          | 1.015          | 1.299          |
| 8                        | Item 18                     | 1.034            | 0.051          | 0.936          | 1.134          |
| 9                        | Item 1                      | 0.996            | 0.070          | 0.859          | 1.137          |
| 10                       | Item 10                     | 1.170            | 0.086          | 1.006          | 1.340          |
| 11                       | Item 15                     | 0.880            | 0.082          | 0.714          | 1.041          |
| 12                       | Item 20                     | 0.702            | 0.067          | 0.573          | 0.835          |
| 13                       | Item 5                      | 0.887            | 0.071          | 0.753          | 1.028          |
| 14                       | Item 12                     | 0.764            | 0.061          | 0.641          | 0.881          |
| 15                       | Item 13                     | 1.108            | 0.074          | 0.965          | 1.251          |
| 16                       | Item 14                     | 0.970            | 0.080          | 0.815          | 1.128          |
| 17                       | Item 3                      | 1.130            | 0.070          | 0.994          | 1.267          |
| 18                       | Item 4                      | 0.789            | 0.058          | 0.677          | 0.898          |
| 19                       | Item 16                     | 0.955            | 0.080          | 0.802          | 1.108          |
| 20                       | Item 19                     | 1.127            | 0.064          | 1.000          | 1.248          |

Note: *Post.mean* refers to posterior mean, *Post.sd* refers to posterior standard deviation, *Cred.lb* refers to the lower bound of 95% credible interval, *Cred.ub* refers to the upper bound of 95% credible interval.
